# Supplementary material for: TMAO, a seafood-derived molecule, produces diuresis and reduces mortality in heart failure rats
Source: eLife. 2020 Jun 8;9:e57028. doi: 10.7554/eLife.57028 (PMC7334024; doi:10.7554/eLife.57028)
Supplement: Figure 4—source data 1. [file elife-57028-fig4-data1.xlsx]

## Sheet: SD
Real-time RT-PCR analysis, heart
Heart		ATG				Heart		AT1a				Heart		AT1b				Heart		tgfb				Heart		AT2				Heart		TIMP2
																																					tissues damaged/unavailable
	WATER	TMAO					WATER	TMAO					WATER	TMAO					WATER	TMAO					WATER	TMAO						WATER	TMAO
1	0.312083	0.0965462				1	0.575472	0.13082				1	0.166086	0.121373				1	0.993224	0.215387				1	0.144586	0.460094					1	0.142533	0.195536
2		0.186233				2		0.12797				2		0.0995399				2		0.114229				2		0.16983					2		0.11908
3	0.130482	0.562935				3	0.575715	0.0507658				3	0.347323	0.0825795				3	1.39777	0.281641				3	0.0949667	0.237944					3	0.169576	0.174325
4	0.508198					4	0.403335					4	0.395536					4	1.02086					4	0.0833564						4	0.175556
5	0.0754944	0.441235				5	0.91418	0.0518325				5	0.470551	0.0975049				5	0.399793	1.64818				5	0.167452	0.146939					5	0.123848	0.111105
6	0.0875586	0.409321				6	0.447242	0.0820091				6	0.246558	0.061002				6	0.204608	0.855595				6	0.130031	0.103665					6	0.158315	0.159003
7	0.132658					7	0.631532					7	0.42101					7	0.24417					7	0.279322						7	0.120742
8		0.377618				8		0.07468				8		0.149167				8		1.75108				8		0.171286					8		0.103444
9	0.172293	0.306721				9	0.63206	0.0821166				9	0.646745	0.0553605				9	0.167766	0.857471				9	0.41054	0.215404					9	0.155243	0.160243
10						10						10						10						10							10
w

## Sheet: SHHF
Real-time RT-PCR analysis, heart
Heart		ATG				Heart		AT1a				Heart		AT1b				Heart		tgfb				Heart		AT2				Heart		TIMP2
																																					tissues damaged/unavailable
	WATER	TMAO					WATER	TMAO					WATER	TMAO					WATER	TMAO					WATER	TMAO						WATER	TMAO
1	1.12506	0.590755				1	1.94031	1.96668				1	1.87716	0.403321				1	0.173573	0.215387				1	0.153306	1.31494					1	0.141121	0.0220971
2	0.488016	0.28187				2	1.31039	1.55329				2	1.33793	0.510506				2	0.19366	0.183646				2	0.732043	1.6077					2	0.0706546	0.0219445
3	0.679209					3	1.67018					3	1.56374					3	0.172043					3	0.742262						3	0.0103087
4		0.175494				4		2.03143				4		0.514057				4		0.157589				4		2.41054					4		0.0196646
5	0.574349	0.61002				5	1.24401	1.25748				5	1.21391	0.488016				5	0.109722	0.20805				5	0.163306	2.07053					5	0.0196671	0.0134554
6	0.378382					6	2.06337					6	0.501736					6	0.197764					6	0.815072						6	0.0182621
7		0.184494				7		1.21012				7		0.215387				7		0.289559				7		1.6358					7		0.0197526
8	0.837987	0.189465				8	1.55537	1.42405				8	0.903478	0.624165				8	0.126151	0.164094				8	0.592641	1.27932					8	0.0155171	0.0192709
9	0.41466					9	0.917709					9	1.47963					9	0.217681					9	0.346277						9	0.0155243

## Sheet: SD-ISO
							Real-time RT-PCR analysis, heart
Heart		ATG				Heart		AT1a				Heart		AT1b				Heart		tgfb				Heart		AT2				Heart		TIMP2
																																					tissues damaged/unavailable/too small sample
	WATER	TMAO					WATER	TMAO					WATER	TMAO					WATER	TMAO					WATER	TMAO						WATER	TMAO
1	0.255939	0.128013				1	0.0238478	0.0055627				1	0.18362	0.234881				1	0.526681	0.376815				1	0.232451	0.123017					1	0.069977	0.127627
2	0.169549					2	0.0549781					2	0.128067					2	0.624165					2	0.14885						2	0.0591458
3		0.0628882				3		0.00400588				3		0.158643				3		0.830429				3		0.705298					3		0.142595
4	0.378382					4	0.057379					4	0.227749					4	0.505366					4	0.169277						4	0.119355
5		0.0306478				5		0.00526263				5		0.408951				5		0.173972				5		0.0395549					5		0.0871715
6	0.188388	0.055253				6	0.0518325	0.0132304				6	0.20083	0.184219				6	0.535318	0.539928				6	0.202631	0.0761506					6	0.105592	0.072293
7	0.421233	0.109767				7	0.0451228	0.0124303				7	0.297699	0.127627				7	0.184284	0.159789				7	0.154788	0.0638986					7	0.0942571	0.11344
8	0.301396	0.124349				8	0.0551689	0.00869171				8	0.340332	0.0532897				8	0.279322	0.186861				8	0.464343	0.0314943					8	0.0818996	0.15822
9	0.31286					9	0.0494828					9	0.151051					9	0.340741					9	0.346277						9	0.113087
10		0.120448				10		0.00581387				10		0.0529216				10		0.267788				10		0.0607702					10		0.15932
