# Supplementary material for: TMAO, a seafood-derived molecule, produces diuresis and reduces mortality in heart failure rats
Source: eLife. 2020 Jun 8;9:e57028. doi: 10.7554/eLife.57028 (PMC7334024; doi:10.7554/eLife.57028)
Supplement: Figure 5—source data 1. [file elife-57028-fig5-data1.xlsx]

## Sheet: SD
Real-time RT-PCR analysis, kidneys
Kidneys		ATG				kidneys		AT1a				kidneys		AT1b				kidneys		Renin				kidneys		AT2
																																tissues damaged/unavailable/too small sample
	WATER	TMAO					WATER	TMAO					WATER	TMAO					WATER	TMAO					WATER	TMAO
1	1.32869	0.750886				1	0.0659231	0.0520181				1	0.377082	0.29575				1	0.0272992	0.0679209				1	0.832876	0.652032
2		1.71416				2		0.0613789				2		0.274595				2		0.0769016				2		0.600024
3	1.32816	1.61172				3	0.0722644	0.0483614				3	0.253843	0.377337				3	0.0316862	0.063728				3	0.838348	0.667012
4	1.56058					4	0.0676982					4	0.831217					4	0.0473661					4	0.861244
5	1.70547	0.878126				5	0.0619434	0.0619033				5	0.183222	0.398142				5	0.0306069	0.0631508				5	0.865235	0.637979
6	1.338	0.959152				6	0.052973	0.0547055				6	0.599957	0.216799				6	0.0270168	0.070856				6	0.961878	0.64095
7	1.36196					7	0.074566					7	0.530718					7	0.0175182					7	0.851051
8		1.68113				8		0.0582914				8		0.468576				8		0.087747				8		0.614158
9	1.71416	1.65975				9	0.062916	0.073812				9	0.523542	0.332616				9	0.018136	0.0893249				9	0.797928	0.645386
10						10						10						10						10
												c

## Sheet: SHHF
Real-time RT-PCR analysis, kidneys
Kidneys		ATG				kidneys		AT1a				kidneys		AT1b				kidneys		Renin				kidneys		AT2
																															tissues damaged/unavailable/too small sample
	WATER	TMAO					WATER	TMAO					WATER	TMAO					WATER	TMAO					WATER	TMAO
1	2.33755	2.3929				1	0.91823	0.802447				1	1.60214	1.78386				1	0.139661	0.237336				1	0.659754	0.615572
2	2.90996	1.88948				2	0.973029	0.886673				2	1.39959	2.12874				2	0.162105	0.26334				2	0.613442	0.354781
3	1.31951					3	0.935403					3	1.36131					3	0.174948					3	0.716978
4		1.88986				4		0.115023				4		1.08298				4		0.263698				4		0.51943
5	2.66319	2.02099				5	1.06992	0.945705				5	2.75586	1.26138				5	0.18136	0.211686				5	0.723217	0.622006
6	2.32869					6	1.03455					6	1.26576					6	0.160506					6	0.539614
7		1.90228				7		0.703847				7		1.42241				7		0.278355				7		0.579682
8	2.89316	1.25992				8	0.926332	0.904627				8	1.42238	1.69741				8	0.130367	0.250007				8	0.456916	0.567752
9	1.56359					9	0.842994					9	1.08799					9	0.173157					9	0.455861

## Sheet: SD-ISO
							Real-time RT-PCR analysis, kidneys
Kidneys		ATG				kidneys		AT1a				kidneys		AT1b				kidneys		Renin				kidneys		AT2
																															tissues damaged/unavailable/too small sample
	WATER	TMAO					WATER	TMAO					WATER	TMAO					WATER	TMAO					WATER	TMAO
1	1.31468	0.82645				1	0.0839976	0.0713931				1	0.470155	0.125167				1	0.0532897	0.0642571				1	0.165601	0.582367
2	1.85305					2	0.0922611					2	0.243384					2	0.0540336					2	0.137761
3		0.560583				3		0.0739721				3		0.292976				3		0.0658351				3		0.777816
4	1.06738					4	0.109072					4	0.173382					4	0.0321286					4	0.177077
5		0.69188				5		0.0939863				5		0.282362				5		0.0632199				5		0.281118
6	1.3036	0.668964				6	0.0868355	0.0985451				6	0.3697	0.289065				6	0.0451228	0.0790283				6	0.448416	0.122006
7	0.893475	0.936272				7	0.0788048	0.0916656				7	0.722644	0.201666				7	0.0322696	0.0814108				7	0.327209	0.157883
8	1.46814	1.27899				8	0.120485	0.0837323				8	0.595399	0.404941				8	0.050789	0.0683014				8	0.244141	0.126375
9	1.02099					9	0.114524					9	0.787483					9	0.0551761					9	0.609536
10		0.937631				10		0.0891222				10		0.200535				10		0.0767796				10		0.125951
