# Supplementary material for: TMAO, a seafood-derived molecule, produces diuresis and reduces mortality in heart failure rats
Source: eLife. 2020 Jun 8;9:e57028. doi: 10.7554/eLife.57028 (PMC7334024; doi:10.7554/eLife.57028)
Supplement: Figure 6—source data 1. [file elife-57028-fig6-data1.xlsx]

## Sheet: SHHF-WATER
Percentage of myocardial fibrosis [%] SHHF Water
	SW1							SW2						SW3					SW4					SW5						SW6					SW7					SW8						SW9
Total area	1229802	2103200	3302784	3986640	4808160		Total area	4734288	2856978	1531170	3640455		Total area	4256118	3243492	4386015	4436640			tissues unavailable			Total area	4886028	3352392	4443552	3674565		Total area	4963302	4470687	2207196	4393368			tissues unavailable			Total area	3784914	3131505	3711312	2916864		Total area	2587293	3117312	4138965
CONNT	10430	8638	6219	17643	20496		CONNT	25251	25650	10425	63076		CONNT	20673	31768	34956	13959						CONNT	12309	21057	7268	21007		CONNT	5916	13390	18888	10883						CONNT	12547	6770	7049	11589		CONNT	13770	3165	17556
	6757	13166	15585	15030	5256			19731	4914	5799	27183			6087	18931	12990	31190							13992	16233	4983	13296			17145	10482	11322	3128							30270	3255	63857	15228			7185	4902	6888
	3770	4184	9282	31898	2439			17757	2456	5418	2404			14811	37761	3546	5307							3925	9126	7035	4449			9279	9618	14703	7010							17003	1944	15333	2832			5733	201244	9080
	7993	552	4422	36333	1634			11532	2730	5463	8454			6555	10458	6228	2187							6498	19140	2959	13470			15558	20820	18592	3939							4679	12378	2583	3954			5633	30890	8091
	7758	8562	13740	104497	963			11799	8664	5544	12252			13437	41667		2148							17638	5025	2067	26049			59547	6669	28344	5973							20030	5016	9176	4602			13722	14106	14891
	9056	6270	4434	40374	2184			63154	9240	9723	7302			2841	23868		1656							12762	5583	6384	38060			20259	15993	6886	7260							14649	12472	6817	25296			1962	8955	7673
	1867	1933	8228	33423	908			13578	1695	3209	28523			4416			4194							23187	3603		54590			68655	8852	2787	11392							5652	1735	3984	6417			10171	6789	2028
	2503	1168	9193	31740	5525			15721	2166		8232			6411			363							52702	4077		13056			24557	3731	4066	3078							11040	12264	11952	13730			8696	24041	9476
	3299	2353	6987	58156				10329	24165		6453			2586										48378	5928		8483			84157	2976		6561							18127	14006	43825	1589			8187	21598	5095
		13024	16264	17283				9363	23943		6458			5046										12309	20508		9787			16792	1805		2883							15201	4092	43825				6661	5447	1764
		9876	35785					18359			37332			5094										24170	4669		3801			34075	7059		18909							4691	6950	30513				4731	4974	19803
		4160	2745					21780			16560													21974	24753					17593	3969		14428							2243	14982	6220				3702	3648
		7804	7761					33915			6837													49641	14841					2264	11136		6247							8791	8910	32167
		2798	8799					18774			705													58272	19161					12367										7131	5406	5919			Total area	2587293	3117312	4138965
		1385						14109			10605													41914	5220															1770	2325	8499			Total CONNT	90153	329759	102345
								19191																	22554				Total area												8957	11191			%	3.48445	10.5783	2.47272
Total area	53433	85873	149444	386377	39405			9414																	7961				Total CONNT	388164	116500	105588	101691									1731			MV	5.51183
Total CONNT	1229802	2103200	3302784	3986640	4808160			12663																	9123				%	7.82068	2.60586	4.78381	2.31465									4947
%	4.34485	4.08297	4.52479	9.6918	0.819544																				4485				MV	4.38125
MV	4.69279						Total area	4734288	2856978	1531170	3640455		Total area	4256118	3243492	4386015	4436640								2151														Total area	3784914	3131505	3711312	2916864
							Total CONNT	346420	105623	45581	242376		Total CONNT	87957	164453	57720	61004								6687														Total CONNT	173824	121462	309588	85237
							%	7.31726	3.69702	2.97687	6.65785		%	2.0666	5.07025	1.316	1.375																						%	4.59255	3.87871	8.34174	2.92221
							MV	5.16225					MV	2.45696									Total area	4886028	3352392	4443552	3674565												MV	4.9338
																							Total CONNT	399671	231885	30696	206048
																							%	8.17988	6.917	0.690799	5.60741
																							MV	5.34877

## Sheet: SHHF-TMAO
Percentage of myocardial fibrosis [%] SHHF-TMAO
									ST2						ST3						ST4						ST5					ST6						ST7					ST8				ST9
		ST1						Total area	4277178	4506840	4817115	4610655		Total area	4863474	4827276	4382856	3755808		Total area	3972672	3408840	4827276	4846320		Total area	4892184	4267053	4725000	4789296			tissues unavailable				Total area	4774086	4264740	4296618		Total area	4926726	4838688	4924800			tissues unavailable
	Total area	3692160	4667121	4533705	4862799			CONNT	7224	9705	61282	3783		CONNT	4497	36510	15108	15447		CONNT	1415	33960	7087	38085		CONNT	15399	21064	4335	21684							CONNT	7205	44712	7500		CONNT	2667	27108	4775
	CONNT	31599	4320	152672	26266				6063	22644	56796	4045			8248	3713	65757	10896			10429	17657	5410	17612			2376	25476	1427	1650								4521	15345	7920			2193	10130	2607
		15088	3880	74507	9624				2610	15690	30875	4011			6894	8722	17356	11059			7056	70257	79010	15096			3090	22379	2716	4854								8679	7128	8106			4965	12366	3636
		9572	5718	50344	36469				2370	52708	50235	7649			4623	26274	22185	32676			3915	9442	2414	9711			7884	35533	16263	2058								25005	9019	1482			5160	7875	6405
		15592	2148	23792	31375				20168	7691	26250	22636			2061	47308	20643	12252			2339	28904	16091	9375			39023	10188	2715	6525								19752	3582	21542			12339	31805	4206
		10398	7593	47751	92379				3795	4164	16814	9321			2928	60372	6482	16140			1728	40446		4296			8310	32673	4210	13222								39713	8178	20054			1496	5514	4671
		9546	8986	37092	42169				10599	3885	11244	9690			4794	47339	8555	61673			2157	12963		14853			979	32673	5161	6554								35346	19533				6639	8857	5647
		18824	6525	5010	18092				3283	5898	37219	16876			5181	17559	26601	4296			2804			49398			23277		1392	5010								19395	29196				3609	7765	22261
		18150	4365	3396	6727				5441	11907	4604				4416	3747	12099	1417						28900			7202		6839	7176								4485	14288				4437	9175	2604
		11103	3805	3854	6924				26691		7106				6912	1641	14538	3105						8743			17942		5478	2779								14268	29083				2919		4549
		1698	13872						12034		1876				5172	2577	8624	4048						31290			9305		2589	3180								12441	18688				24512		23556
			4703						14251		5670					9803		9933									38748		2991	4968								907					1904		20625
			14739						3318		10062					4399				Total area	3972672	3408840	4827276	4846320			1364		8833									5358					18607		8492
			4758						19970							4665				Total CONNT	31843	213629	110012	227359			658																7625		5969
			4155						8353											%	0.801551	6.26691	2.27897	4.69137													Total area	4774086	4264740	4296618			9849		3655
			5685						2913											MV	3.5097					Total area	4892184	4267053	4725000	4789296							Total CONNT	197075	198752	66604			5665		5130
			9835						15535					Total area	4863474	4827276	4382856	3755808								Total CONNT	175557	179986	64949	79660							%	4.12802	4.66035	1.55015			22325
			5982						6210					Total CONNT	55726	274629	217948	182942								%	3.58852	4.21804	1.37458	1.66329							MV	3.44617
									3657					%	1.14581	5.68911	4.97274	4.87091								MV	2.71111															Total area	4926726	4838688	4924800
	Total area	3692160	4667121	4533705	4862799				3203					MV	4.16964																											Total CONNT	136911	120595	128788
	Total CONNT	141570	111069	398418	270025																																					%	2.77894	2.49231	2.61509
	%	3.83434	2.37982	8.78791	5.55287			Total area	4277178	4506840	4817115	4610655																														MV	2.62878
	MV	5.13874						Total CONNT	177688	134292	320033	78011
								%	4.15433	2.97974	6.64367	1.69197
								MV	3.86743

## Sheet: Total results
Percentage of myocardial fibrosis [%]
							TOTAL RESULTS
	SHHF - WATER		SHHF - TMAO
	SW1	4.69279	ST1	5.13874
	SW2	5.16225	ST2	3.86743
	SW3	2.45696	ST3	4.16964
	SW5	5.34877	ST4	3.5097
	SW6	4.38125	ST5	2.71111
	SW8	4.9338	ST7	3.44617
	SW9	5.51183	ST8	2.62878
			SHHF - WATER	SHHF - TMAO
	X		4.64109	3.6388												0
	SE		0.40475	0.338585
					.

## Sheet: NC ratio
N:C ratio of cardiomyocytes
SHHF-WATER																												SHHF-TMAO
	SW1			SW2			SW3			SW4			SW5			SW6			SW7			SW8			SW9			ST1			ST2			ST3			ST4			ST5			ST6			ST7			ST8
	cardiomyocytes	nucleus		cardiomyocytes	nucleus		cardiomyocytes	nucleus		tissues unavailable			tissues unavailable			cardiomyocytes	nucleus		tissues unavailable			cardiomyocytes	nucleus		tissues unavailable			cardiomyocytes	nucleus		cardiomyocytes	nucleus		cardiomyocytes	nucleus		tissues unavailable			cardiomyocytes	nucleus		tissues unavailable			cardiomyocytes	nucleus		tissues unavailable
	0.0136106	0.00603736		0.0159703	0.00778545		0.0169035	0.00608684								0.0204612	0.00620739					0.0167139	0.00793627					0.0130775	0.00601336		0.0209196	0.00774729		0.0131566	0.00269476					0.0162827	0.00655573					0.0167316	0.00384966
	0.0135232	0.00693722		0.0182565	0.00758295		0.0167139	0.00409224								0.0140499	0.00516486					0.016558	0.00769932					0.0130775	0.00872778		0.0191441	0.00901182		0.016558	0.00348601					0.0143732	0.00840778					0.0160812	0.00758295
	0.0157836	0.00600635		0.0179453	0.0086081		0.0167847	0.0066232								0.0149494	0.00620739					0.0159145	0.00898712					0.0142489	0.00572293		0.0178335	0.00809344		0.0170432	0.00310369					0.0152293	0.00719176					0.0163327	0.00658955
	0.016956	0.00710557		0.0166784	0.00681074		0.0192483	0.00598866								0.0179123	0.00608684					0.0170996	0.00818449					0.0149741	0.00465156		0.0183011	0.00758295		0.0182605	0.00461959					0.0158024	0.00568395					0.0162098	0.00655573
	0.0134738	0.00512021		0.0157083	0.00536195		0.0157083	0.00854763								0.018879	0.00823863					0.0153311	0.00871078					0.0163418	0.00789884		0.0206343	0.00682161		0.0186261	0.00386886					0.0187332	0.00986745					0.0154419	0.00816636
	0.016012	0.00638382		0.017186	0.00450591		0.0163373	0.00793627								0.0183859	0.00637232					0.0164457	0.00832808					0.0171515	0.00844296		0.0172892	0.0065783		0.0164142	0.00438929					0.0190042	0.00620739					0.0163916	0.00740497
	0.0134793	0.00644732		0.0170866	0.00785179		0.0174088	0.00672314								0.016558	0.00637232					0.016558	0.00707751					0.0182565	0.00801062		0.0163327	0.00634902		0.0155185	0.00740497					0.0186738	0.0065783					0.0111706	0.00501934
	0.0177252	0.00783219		0.0196295	0.00620739		0.0181588	0.00706703								0.0121737	0.00774729					0.0177126	0.00544424					0.0220509	0.00601336		0.0174598	0.0100091		0.0166072	0.00416404					0.0176665	0.00694007					0.0176623	0.00658955
	0.0102722	0.00783689		0.0190471	0.00654442		0.0152827	0.00792693								0.0124148	0.00501934					0.0142489	0.00730421					0.0147899	0.00577449		0.0167139	0.00758295		0.016378	0.00544424					0.0173406	0.00815728					0.0167316	0.00735476
	0.0112236	0.00501746		0.0208202	0.00555206		0.0161181	0.00716078								0.0132911	0.00438929					0.0183375	0.00739495					0.0161732	0.00568395		0.020261	0.00551187		0.0181588	0.00272212					0.0186738	0.00702497					0.0188043	0.00423462
	0.0127563	0.00489648		0.0176623	0.00621931		0.0189417	0.00739495								0.0154083	0.00363176					0.0158258	0.00789884					0.0136541	0.00726352		0.0205912	0.00544424		0.0200958	0.00601336					0.0184984	0.00816636					0.0180236	0.00506343
	0.0131397	0.00688538		0.0160812	0.00482361		0.0194817	0.00801062								0.0179288	0.00709842					0.0178626	0.00793627					0.015485	0.00764135		0.0171688	0.00617147		0.0210608	0.00547139					0.0197949	0.00500455					0.0194665	0.00634902
	0.0129122	0.00789279		0.016558	0.00601336		0.0152439	0.00758295								0.0198733	0.00815728					0.0157883	0.0100755					0.0179989	0.00812086		0.0189925	0.00538952		0.0234545	0.00277603					0.0138641	0.0064532					0.0186738	0.00847799
	0.0117083	0.00796373		0.0180319	0.00626679		0.0106198	0.00950795								0.0216815	0.00730421					0.0190548	0.0100755					0.0191789	0.00743493		0.0182605	0.00879544		0.0202318	0.00489982					0.0176665	0.0064532					0.0183011	0.00808428
	0.0154034	0.00683904		0.0169254	0.00626679		0.00956235	0.00962415								0.0217565	0.00516486					0.0176959	0.00902004					0.019329	0.00726352		0.0161732	0.00902004		0.0183657	0.00547139					0.0151366	0.00486947					0.0223181	0.00620739
	0.0126102	0.00612955		0.0203741	0.00626679		0.0149939	0.00640711								0.018122	0.00500455					0.0204177	0.00789884					0.0186381	0.00888762		0.0144913	0.00953131		0.0184503	0.00793627					0.0185144	0.00808428					0.0161594	0.00778545
	0.0155709	0.00727272		0.0175318	0.00538952		0.0132464	0.00681074								0.0225295	0.00555206					0.0190548	0.0086081					0.0205624	0.00685412		0.0132464	0.00620739		0.0195159	0.00601336					0.0205804	0.00697203					0.022726	0.00915053
	0.0163418	0.00683921		0.0204322	0.00774729		0.00985994	0.00716078								0.0153263	0.00430405					0.0136541	0.00999429					0.0215202	0.00758295		0.0141183	0.00586362		0.0202318	0.00739495					0.016625	0.00654442					0.0206953	0.00962415
	0.016012	0.00560892		0.0213543	0.00672314		0.0126102	0.00735476								0.0158398	0.0052361					0.017498	0.00937453					0.0231524	0.00707751		0.0134738	0.00847799		0.0190159	0.00430405					0.0187332	0.00578731					0.0188633	0.00931108
	0.0181955	0.00735921		0.0185424	0.00401916		0.0123969	0.0104722								0.0148599	0.00637232					0.0195993	0.00831027					0.0232769	0.00682161		0.0132576	0.0103655		0.020731	0.00962415					0.0196936	0.00634902					0.018879	0.00577449
	0.0144657	0.00780536		0.0226345	0.00672314		0.0161227	0.00908552								0.0162463	0.00886258					0.0155376	0.00747468					0.0200219	0.00878701		0.0129408	0.00719176		0.0144657	0.00739495					0.0154034	0.00461959					0.0162417	0.0092712
	0.0135396	0.00692636		0.0220509	0.00688648		0.0168859	0.00655573								0.0132743	0.00818449					0.0171515	0.0106476					0.0190859	0.00793627		0.0158539	0.00865103		0.0158258	0.0107859					0.0112236	0.00538952					0.0181302	0.00823863
	0.0138213	0.00502727		0.0221314	0.00572293		0.0161227	0.00877857								0.0143835	0.00694007					0.0204648	0.00707751					0.0171688	0.00707751		0.0124148	0.00832808		0.0147347	0.00832808					0.0161869	0.00773772					0.018293	0.012569
	0.0130718	0.00687374		0.0216438	0.00697203		0.0136106	0.00517919								0.0132576	0.00709842					0.0177752	0.00895408					0.0189417	0.000769932		0.0139971	0.00654442		0.0133911	0.00962415					0.019637	0.00620739					0.0186222	0.00709842
	0.0123249	0.00654832		0.0218381	0.00538952		0.0131679	0.00601336								0.0143732	0.00617147					0.0192483	0.00950795					0.021103	0.00694007		0.0131679	0.00694007		0.0186579	0.00872778					0.0174768	0.00688648					0.0184944	0.00812086
	0.0138801	0.0080363		0.0217122			0.0144503	0.00685412								0.015713	0.00731435					0.0193098	0.00803832					0.0204032	0.00925521		0.014013	0.00694007		0.0154946	0.00865103					0.0154754	0.00572293					0.016625	0.00998688
	0.0138641	0.00755069		0.0185104			0.0218856	0.00740497								0.0140973	0.00634902					0.0180236	0.00740497					0.0239454	0.00743493		0.0146084	0.00572293		0.017746	0.00930312					0.0150334	0.00793627					0.0163327	0.00908552
	0.0165938	0.00793529		0.0237215			0.0191131	0.00886258								0.0156327	0.00620739					0.0157083	0.00952353					0.016558	0.00743493		0.0158725	0.00688648		0.0139547	0.00769932					0.0177252	0.00620739					0.0143732	0.0112236
	0.0180975	0.00808684		0.0225591			0.0162463	0.00547139								0.0192521	0.00608684					0.0170866	0.00758295					0.0206343	0.00500455		0.0144657	0.00586362		0.0186261						0.0174301	0.00587625					0.018879
	0.0151366	0.0089373		0.0228528			0.0193443	0.00981474								0.017746	0.00743493					0.0182524	0.00815728					0.0179123	0.00572293		0.0161594			0.0193749						0.0146591	0.00939821					0.016012
	0.015058	0.00758004		0.023178			0.0196672	0.00979963								0.0235962	0.00879544					0.0185184	0.00886258					0.0170996	0.00586362		0.0186738			0.0157272						0.0162098	0.00801062					0.0181588
	0.0107377	0.00637391		0.0164773			0.0174556	0.00809344								0.021997	0.00901182					0.0179082	0.0104012					0.0192483	0.00621931		0.0186738			0.0184221						0.0159517	0.00979963					0.0161732
	0.0146591	0.00504468		0.0152536			0.0144298	0.00789884								0.0206953	0.00430405					0.0192406	0.00965489					0.0190548	0.00655573		0.0217259			0.0137406						0.0164593	0.0134738					0.0204032
	0.0174088	0.00673633		0.0150924			0.0149741	0.00801062								0.0223976	0.00723285					0.0163146	0.0144708					0.0210291	0.00577449		0.0132576			0.0194551						0.016625	0.0119897					0.0215718
	0.0123429	0.00524693		0.0164142			0.0144503	0.00769932								0.0208344	0.0064532					0.017186	0.00697203					0.0181588	0.00602567		0.0151659			0.0160859						0.0196672	0.00598866					0.0232131
	0.0158585	0.00750789		0.0157977			0.0145525	0.00544424								0.0163373	0.00815728					0.016378	0.00694007					0.0225558	0.00555206		0.0160859			0.0175318						0.0178127	0.00792693					0.0196672
	0.0132911	0.0086535		0.0170171			0.0167139	0.00769932								0.0206594	0.00943755					0.0204902	0.00854763					0.0205335	0.00620739		0.0129064			0.020385						0.0208202	0.00785179					0.0161869
	0.0129122	0.00603364		0.0133412			0.0167139	0.00626679								0.0142437						0.018879	0.00846925					0.0192944	0.00769932		0.0144708			0.0200847						0.0161686	0.00981474					0.0214547
	0.0131115	0.0048378		0.0163418			0.018171	0.00709842								0.0129408						0.0136051	0.00885421					0.0161227			0.0139971			0.017186						0.0170083	0.00845173					0.014649
	0.0192521	0.00804279		0.0172549			0.0194322	0.00681074								0.0164773						0.017396	0.00747468					0.020838			0.0104012			0.0151903						0.0174598	0.00931108					0.0208202
	0.0132743	0.00753597		0.0161181			0.0160812									0.017396						0.017396	0.00747468					0.016558			0.0152827			0.0146591						0.0200182	0.00809344					0.0193443
	0.0120329	0.00863074		0.015485			0.0210467									0.0174301						0.0142905	0.00785179					0.0170519			0.0178957			0.0155185						0.0154034	0.00925521					0.0207632
	0.0117083			0.0212604			0.0195993									0.0244506						0.0150137	0.00588884					0.0132967			0.0137998			0.014013						0.0177084	0.00655573					0.0196936
	0.0101049			0.0208024			0.021103									0.0224472						0.0141183	0.00731435					0.0158258			0.0129408			0.0148099						0.0219464	0.00801062					0.0170953
	0.0114004			0.0196295			0.0195576									0.0199663						0.0155899	0.00702497					0.0161915			0.0132743			0.0183536						0.021613	0.0052361					0.0185424
	0.0155994			0.0182565			0.0216438									0.0175614						0.0151268	0.00588884					0.0131566			0.0124386			0.0139918						0.0177126						0.0173406
	0.0127969			0.0165311			0.0198882									0.015485						0.0145117	0.00773772					0.015485			0.0139121			0.0130888						0.0150186						0.0157883
	0.0169953			0.0180975			0.017966									0.012082						0.0166205	0.00709842					0.0167139			0.014155			0.015058						0.0170475						0.0173277
	0.0121554			0.018879			0.0191247									0.0144144						0.0148699						0.0164457			0.0148699			0.0176623						0.022726						0.0219565
	0.0169122			0.0199626			0.021103									0.0174088						0.0119525						0.0164593			0.0136051			0.016012						0.0174301						0.0214547
	0.0193328			0.0168859			0.0198696									0.0177961						0.0135396						0.0209444			0.0153263			0.0150334						0.0185144						0.0121737
	0.0199366			0.0157883			0.0179453									0.0161915						0.0137406						0.0163554			0.0149741			0.0150334						0.0216815						0.012082
	0.0175909			0.0144913			0.0155376									0.0158539						0.0151366						0.0153263			0.0129408			0.018879						0.0196295						0.0151708
	0.0154419			0.0166072			0.0251645									0.0168727						0.0152293						0.0169778			0.0122284			0.0141968						0.0148099						0.0148599
	0.0156327			0.0209444			0.0200958									0.0149939						0.0132743						0.0137568			0.018077			0.0137406						0.0164593						0.0127097
	0.0127969			0.0179742			0.021257									0.015713						0.0143835						0.0141341			0.017396			0.017746						0.0142437						0.0155185
	0.0130718			0.0172033			0.0173235									0.0187688						0.0132296						0.0163146			0.0194779			0.0156327						0.0169385						0.0189574
	0.0112697			0.0212604			0.016378									0.0176287						0.0118592						0.0215202			0.019603			0.0168067						0.012663						0.0213543
	0.0113287			0.0207525			0.0169953									0.0196483						0.0121554						0.0164457			0.0205912			0.0161869						0.014649						0.0133467
	0.0123249			0.0295848			0.0199737									0.0149791						0.0150973						0.0196634			0.0220911			0.0150924						0.0164457						0.0161915
	0.0166205			0.0270738			0.0193098									0.0139494						0.0155899						0.0155185			0.0163418			0.0168376						0.0174768						0.0187728
	0.0127097			0.0265738			0.0184984									0.00964722						0.0166205						0.0142437			0.0147397			0.0190548						0.0165356						0.0226476
	0.0161869			0.0300397			0.0178584									0.0178003						0.0135396						0.0131679			0.0190198			0.0162463						0.0157036						0.0201694
	0.0167139			0.0347003			0.0161594									0.0159703						0.0162463						0.0138213			0.0174088			0.0165356						0.0170475						0.0191479
	0.0138641			0.0284875			0.0176665									0.0155899						0.0194931						0.0146591			0.0179082			0.0153408						0.0151366						0.0152681
	0.0240103			0.0227651			0.0173918									0.0170953						0.0181425						0.0158725			0.0184342			0.0183011						0.0174598						0.0144657
	0.0252351			0.0148599			0.0195576									0.0148599						0.0174598						0.016625			0.016228			0.0181302						0.0139441						0.0150137
	0.011581			0.0137406			0.0188986									0.0151268						0.0145729						0.0171688			0.0188043			0.0185424						0.0121554						0.0134463
	0.0127097			0.0170866			0.0162827									0.0155899						0.0163327						0.0171515			0.0205227			0.0154419						0.00153986						0.0161732
	0.0127969			0.016012			0.014649									0.0166562						0.0154179						0.0147095			0.0215718			0.0127504						0.0120329						0.0137998
	0.0173619			0.0178003			0.0189574									0.0190548						0.0223579						0.0149741			0.0234197			0.0148549						0.0150186						0.016378
	0.0142905			0.0175571			0.0138641									0.018879						0.0211416						0.0136541			0.0158258			0.0177252						0.0196333						0.0146338
	0.0139068			0.0160443			0.0150334									0.0158258						0.0215202						0.0125336			0.0134463			0.0170171						0.0162417						0.0158725
	0.0123249			0.013773			0.0140499									0.0197537						0.0157977						0.0139068			0.0200958			0.016558						0.0165714						0.0224241
	0.0134683			0.0174088			0.0150137									0.0192406						0.0128661						0.0125336			0.0174088			0.0161732						0.0128489						0.0202025
	0.0143267			0.0157083			0.0124267									0.0175571						0.014013						0.0149741			0.0186897			0.0120267						0.0162827						0.021257
	0.0129122			0.0125867			0.0153408									0.0214547						0.012663						0.0149741			0.0155709			0.0182605						0.0172892						0.0168859
	0.0177752			0.0189574			0.0158725									0.0187688						0.0175107						0.017966			0.0154754			0.0208344						0.0178584						0.0193328
	0.0125336			0.0174301			0.0179288									0.016378						0.0166784						0.0182402			0.0149741			0.0147899						0.0165356						0.0200958
	0.011549			0.0160812			0.018122									0.0146591						0.0134463						0.0147899			0.0166784			0.0145525						0.0158024						0.0159378
	0.0130945			0.0163418			0.0202098									0.0133911						0.0143835						0.017498			0.0152681			0.0188319						0.017746						0.0194817
	0.0142437			0.0157883			0.0191131									0.0147548						0.0127969						0.0176959			0.0164457			0.0187964						0.0159005						0.0169778
	0.0134793			0.0164593			0.0195159									0.0172162						0.0149494						0.0179989			0.0164142			0.0147899						0.0153263						0.0153311
	0.0194779			0.0172162			0.0204576									0.0161915						0.0150334						0.0153311			0.0171688			0.014155						0.0185783						0.0158539
	0.0201437			0.0166651			0.0201547									0.0150137						0.0163418						0.0155185			0.0184864			0.0141968						0.0169429						0.0158258
	0.0214478			0.0164593			0.0204576									0.013773						0.0147548						0.0177126			0.0142853			0.0123969						0.0104012						0.0161915
	0.0152536			0.0211766			0.0175909									0.0105146						0.0132743						0.0174216			0.0174768			0.0119897						0.0158258						0.0182524
	0.0159517			0.0153311			0.0186261															0.0157036						0.0199626			0.0170866			0.0184824						0.0130888						0.016012
	0.0136703			0.0142489			0.012082															0.0157836						0.0172033			0.0173704			0.0150334						0.0187491						0.0184342
	0.019117			0.00969319			0.0191595															0.021229						0.0200219			0.0169122			0.0177961						0.0150186						0.0201547
	0.0203158			0.0138641			0.012663															0.0162098						0.0191247			0.0153408			0.0149494						0.0189574						0.0217259
	0.0176623			0.0185783			0.014013															0.0166651						0.0223479			0.0175951			0.0176623						0.0166072						0.0186897
	0.0189574			0.0242803			0.0146591															0.018879						0.0237215			0.0225065			0.0186222						0.0192483						0.0189378
	0.0163146			0.0271803			0.017186															0.0188751						0.0226738			0.0208344			0.0187964						0.0155185						0.0185943
	0.0178003			0.0130718			0.0133911															0.0193098						0.0194208			0.022726			0.0235962						0.0171688						0.0244476
	0.0222782			0.0134463			0.0191441															0.0187728						0.0202098			0.0189261			0.0213509						0.017498						0.0242803
	0.0182605			0.0160259			0.0221682															0.0184984									0.0210045			0.0255009						0.018402						0.0232578
	0.0224472			0.0162827			0.0190159															0.0180319									0.0173021			0.022118						0.0180975						0.0249783
	0.016012			0.0152293			0.0180236															0.0175571									0.0165356			0.0177627						0.0173021						0.0248206
	0.0181098			0.0162098			0.0175909															0.0178335									0.0146084			0.0179082						0.015713						0.0189378
	0.0185783			0.0161594																		0.0200958									0.0149791			0.0182565						0.016625						0.0144657
	0.0216438			0.0167139																		0.018402									0.0182077			0.0216746						0.0174088						0.0149791
	0.0189261			0.017746																		0.0193328									0.0192406			0.021589						0.0171688						0.017574
	0.0193864			0.0215615																		0.0171515									0.0129064			0.017746						0.0206881						0.0157272
	0.017746			0.018293																		0.017746									0.0158258			0.0200774						0.0142489						0.000384966
	0.0156327			0.0183536																		0.0192406												0.0184824						0.0149939						0.0184503
	0.0190042			0.024484																		0.0214547												0.0220609						0.0155376						0.0189574
	0.0178584			0.0166651																		0.0173021												0.0193443						0.016625						0.019117
	0.019637			0.0188986																		0.0206881																		0.0135615						0.0182524
	0.0208202			0.0173406																		0.0194208																		0.016625						0.0188043
	0.0180442			0.0207917																		0.0182889																		0.0163327
	0.0161686			0.0224472																		0.0192483																		0.016369
	0.0154034			0.0158024																		0.0184824																		0.0171515
	0.016625																					0.0162463																		0.0185783
	0.0192521																					0.0180975																		0.0206953
	0.0223579																					0.0165356																		0.0246498
	0.0185424																					0.0158398																		0.0223313
	0.0192829																					0.0167714																		0.0229241
	0.0184984																					0.0119402
																						0.0171515
																						0.019117
																						0.0173021
MV	0.0156989	0.00686579		0.0185633	0.00632962		0.0171489	0.00743301								0.0168777	0.00658576					0.0167634	0.0082824					0.0174648	0.00679339		0.0166325	0.00736632		0.0172168	0.00615417					0.0169127	0.00740111					0.0178314	0.00767034
																Cardiomyocytes														N/C
																SHHF-WATER	SHHF-TMAO				SHHF-TMAO										SHHF-WATER	SHHF-TMAO
															MV	17.0172	17.21				7.076									MV	0.419064	0.411398
															SE	0.40665	0.186912				0.2436									SE	0.025983	0.014832
																Cardiomyocytes															N/C
