# Supplementary material for: TMAO, a seafood-derived molecule, produces diuresis and reduces mortality in heart failure rats
Source: eLife. 2020 Jun 8;9:e57028. doi: 10.7554/eLife.57028 (PMC7334024; doi:10.7554/eLife.57028)
Supplement: Figure 8—source data 1. [file elife-57028-fig8-data1.xlsx]

## Sheet: ISO
Percentage of necrotic and inflammatory area in myocardium [%]
ISO WATER
	IW1								IW2						IW3				IW4						IW5			IW6			IW7						IW8			IW9						IW10
	Total area	4156964	4224936	3179176	4205568	3784480			3894560	4139264	3190120	3022520	3483648		tissues unavailable				3436636	3514336	4184064	3600468	2803904		tissues unavailable			tissues unavailable			3201536	2690064	3345300	3250456	3612712		tissues unavailable			3417432	3793184	4131372	3369132	3854400		tissues unavailable
	Area of ncrosis / infalmmation	10878	17308	163655	4112	25529			21130	241403	201033	174911	83994						25542	8058	7328	56938	6195								16699	31355	24754	34379	13080					22687	52910	5849	42167	23627
		50689	25049	7309	24865	29832			15609	13085	18576	82031	36443						27039	66898	12300	47474	14713								60368	83779	37819	29871	35973					88520	50729	5177	50592	54044
		6458	17497	15294	22566	25121			10827	51945	18827	18695	17825						27126	8318	6735	34604	32686								22834	9802	39110	164229	31318					106222	99890	48710	39262	35747
		7389	26366	19797	6959	26450			41725	13658	34850	65687	29917						3331		14629	20627	10330								26091	14560	39110	46093	32962					71143	20605	6062	129711	177699
		24387	6043	34584	2715	101351			10361	48191	68432	7907	16273						5841		16395		20698								12452	6080	15164	70780	64972					73109	20001	40590	91988	77065
		6783	43966	87060	53723	95715			3430	42240	54405	6541	14212						14877		21574		4232								13774	15506	20208	8478	12565					18059			29358
		59917	945	46442		89574			5146	113736	111486	4086									21704												19732	14743						27481			17169
			42959	15293		83078			15604	11493	28888										11490												14522							72257			53327
									7187	30701	105062										6518
									7679												2444
									60453
	SUM	166501	180133	389434	114940	476650			123832	535751	536497	359858	198664						103756	83274	112155	159643	88854								152218	161082	210419	368573	190870					479478	244135	106388	453574	368182
	%	4.00535	4.26357	12.2495	2.73304	12.5949			3.17961	12.9431	16.8175	11.9059	5.70276						3.01912	2.36955	2.68053	4.43395	3.16894								4.75453	5.98804	6.28999	11.3391	5.28329					14.0304	6.43615	2.57513	13.4626	9.55225
	IT1							IT2			IT3						IT4			IT5			IT6						IT7			IT8						IT9			IT10
ISO TMAO	Total area	3902752	2171520	3567360	2273632	3761191		tissues unavailable			3267000	3507344	3696592	3102624	2948400		tissues unavailable			tissues unavailable			2007864	3079064	3257184	4025644	2903616		tissues unavailable			2639556	2562864	2574720	3019872	2667600		tissues unavailable			3400452	2975968	3929644	3237296	623664
	Area of ncrosis / infalmmation	26969	106083	77291	75779	72801					139119	20700	47564	75831	35175								5827	45599	32854	85872	151762					20734	71082	83412	156293	11158					24542	3582	138633	23171	67124
		17770	47676	12660	44217	102739					195306	165172	38411	33750	44490								27591	32531	17071	29719	78769					151336	125753	150526	16563	67941					49227	10863	149923	47602	62481
		9173	25438	16807	1319	5299					79674	13608	8520	33705	45528								6319	96734	21979	77803	38645					94707	20410		31009	27421					170304	12667	64304	28793	61262
		50774	10906	6268	6695	1716					33149	10606	2925	32123	34691								10721	17278	29389	49833	96720					19854	19786		12162	6128					4196	37659	28801	31129	16862
		9815		19127		38109					29690	38289	23775		15351								54791	37248	59227	81626						33011	115562			4796					4600	16502	17513	50122
		5101				123421					61937	8368	38663		25187								8944	45197	30940	45223							119820			3321					5913	437	26152	32540
		31649									10968	13134			1282								11485	47110									18328			371					3517	14844	12276	30813
											3997	3121											13173																		19832	8050	33208	41115
	SUM	151251	190103	132153	128010	344085					553840	272998	159858	175409	201704								138851	321697	191460	370076	365896					319642	490741	233938	216027	121136					282131	104604	470810	285285	207729
	%	3.8755	8.75437	3.7045	5.6302	9.1483					16.9526	7.78361	4.32447	5.65357	6.84113								6.91536	10.4479	5.87808	9.19296	12.6014					12.1097	19.1481	9.08596	7.15352	4.54101					8.29687	3.51496	11.981	8.81245	33.3078
		ISO-WATER	ISO-TMAO
	MV	7.91115	9.02621
	SD	1.65481	1.93201
	SE	0.66341	0.77454
						% - percentage of miocardium involved in necrotic and inflammation processes
