# Supplementary material for: TMAO, a seafood-derived molecule, produces diuresis and reduces mortality in heart failure rats
Source: eLife. 2020 Jun 8;9:e57028. doi: 10.7554/eLife.57028 (PMC7334024; doi:10.7554/eLife.57028)
Supplement: Figure 9—source data 1. [file elife-57028-fig9-data1.xls]

## Sheet: Excretion after TMAO
	Effects of TMAO on renal excretion in anaesthetised Sprague-Dawley rats.
Excretion parameter
V (diuresis)	TMAO i.v.	baseline periods (saline infusion)				TMAO Bolus + TMAO infusion
[µl/min/g]	rat nr/ [min]	-40	-30	-20	-10	10	20	30	40	50	60
	0	9.33809	10.0522	10.2444	10.3268	29.3051	12.3043	14.3367	15.9022	16.9734	17.7698
	2		4.02778	3.85417	4.16667	18.1597	15.4167	13.6111	13.2639	15.2083	14.0625
	4		8	8.1	8.17439	36.1853	26.594	21.4	21.4	19.7	19.7
	5	3.88019	3.35943	3.1518	2.6889	4.86726	6.70524	8.06671	8.74745	8.4241
	11		4.5369	4.74398	5.00753	15.1355	12.6506	8.17018	5.04518	3.76506	3.50151
	12	7.37427	9.37982	9.75008	9.34897	20.7961	18.5437	17.7723	16.9701	16.7232	14.9337
	19	2.18978	2.41193	3.87179	3.1736	10.9172	5.23643	3.01492	1.87242	2.09457	1.36465
	20	3.35619	1.87658	0.830025	0.866113	8.22808	15.0848	10.646	9.23854	9.38289	8.80549
	TMAO i.v.
Uosm	rat nr/ [min]	-40	-30	-20	-10	10	20	30	40	50	60
[mosmol/kg H2O]	0	610	628	630	640	570	620	620	650	655	650
	2		575	630	665	630	660	730	745	740	750
	4		620	625	630	480	530	575	575	600	600
	5	675	730	735	720	690	660	670	690	735
	11		600	590	595	595	625	645	640	615	575
	12	655	690	735	750	685	670	725	755	730	725
	19	645	655	675	670	675	635	620	600	580	550
	20	580	590	600	600	480	495	535	570	590	590
	TMAO i.v.	baseline periods (saline infusion)				TMAO Bolus + TMAO infusion										,
Uosm V	rat nr/ [min]	-42	-30	-20	-10	10	20	30	40	50	60
[µosmol/min/g]	0	5.69624	6.31277	6.454	6.60917	16.7039	7.62867	8.88877	10.3364	11.1176	11.5504
	2		2.31597	2.42813	2.77083	11.4406	10.175	9.93611	9.8816	11.2542	10.5469
	4		4.93297	5	5.14986	17.3689	14.0948	12.2834	12.3	11.8	11.8365
	5	2.61913	2.45238	2.31658	1.93601	3.35841	4.42546	5.4047	6.03574	6.19171
	11		2.72214	2.79895	2.97948	9.00565	7.90663	5.26977	3.22892	2.31551	2.01337
	12	4.83015	6.47208	7.16631	7.01172	14.2453	12.4243	12.8849	12.8124	12.208	10.8269
	19	1.43431	1.62805	2.5941	2.14218	6.9324	3.24659	1.80895	1.086	1.15202	0.69597
	20	1.94659	1.10718	0.498015	0.519668	3.94948	7.46698	5.6956	5.26597	5.53591	5.19524
	TMAO i.v.
UNaV/g	rat nr/ [min]	-40	-30	-20	-10	10	20	30	40	50	60
[µmol/ml/g]	0	0.0280143	0.0201044	0.0204889	0.0309805	0.263746	0.0246086	0.0286734	0.0318044	0.0339467	0.0355397
	2	0.0684722	0.0501042	0.0458333	0.181597	0.0770833	0.0680556	0.0663194	0.0760417	0.0703125	0.0638889
	5	0.019401	0.0134377	0.00945541	0.00806671	0.0146018	0.0134105	0.0161334	0.0174949	0.0168482
	11		0.0272214	0.00474398	0.0100151	0.0302711	0.0126506	0.00817018	0.0100904	0.00376506	0.00700301
	12	0.0516199	0.0375193	0.0292502	0.0186979	0.0207961	0.0370873	0.0355446	0.0339401	0.0334465	0.0298673
	19	0.0109489	0.00964773	0.0116154	0.00634719	0.0218343	0.00523643	0.00602983	0.00374484	0.00628372	0.00409394
	20	0.0335619	0.0131361	0.00581018	0.00606279	0.246842	0.316781	0.0851678	0.0554313	0.0562974	0.0440274
			ANOVA
	TMAO i.v.	baseline periods (saline infusion)				TMAO Bolus + TMAO infusion
UNa	rat nr/ [min]	-40	-30	-20	-10	10	20	30	40	50	60
[mmol/L]	0	3	2	2	3	9	2	2	2	2	2
	2		17	13	11	10	5	5	5	5	5
	5	5	4	3	3	3	2	2	2	2
	11		6	1	2	2	1	1	2	1	2
	12	7	4	3	2	1	2	2	2	2	2
	19	8	5	4	3	2	2	1	2	2	3
	20	10	7	7	7	30	21	8	6	6	5
	DM-60 + Theo
UKV	rat nr/ [min]	-40	-30	-20	-10	10	20	30	40	50	60
[µmol/ml/g]	0	0.0373524	0.0301566	0.0307333	0.0309805	0.293051	0.0123043	0	0.0159022	0.0169734	0.0177698
	2		0.13875	0.129167	0.381354	0.0616667	0.0272222	0.0265278	0.0304167	0.028125	0.0255556
	5	0.124166	0.0974234	0.0819469	0.0618448	0.0973451	0.0335262	0.0403336	0.0437372	0.0421205
	11		0.0680535	0.0474398	0.0450678	0.151355	0.0506024	0.00817018	0.00504518	0	0.00350151
	12	0.206479	0.290774	0.224252	0.149583	0.207961	0.055631	0.0355446	0.0339401	0.0167232	0.0149337
	19	0.157664	0.144716	0.17423	0.120597	0.283846	0.0523643	0.0120597	0.00561726	0.00628372	0.00272929
	20	0.0738362	0.0431613	0.0190906	0.0199206	0.246842	0.422375	0.223565	0.101624	0.0750632	0.0616384
	DM-60 + Theo	baseline periods (saline infusion)				TMAO Bolus + TMAO infusion
UK	rat nr/ [min]	-40	-30	-20	-10	10	20	30	40	50	60
[mmol/L]	0	4	3	3	3	10	1	0	1	1	1
	2		53	36	31	21	4	2	2	2	2
	5	32	29	26	23	20	5	5	5	5
	11		15	10	9	10	4	1	1	0	1
	12	28	31	23	16	10	3	2	2	1	1
	19	71	72	60	45	38	26	10	4	3	3
	20	22	23	23	23	30	28	21	11	8	7

## Sheet: Excretion after Urea
	Effects of urea on renal excretion in anaesthetised Sprague-Dawley rats.
	Excretion parameter
	V (diureza)	Urea bolus	baseline periods (saline infusion)				Urea bolus + Urea infusion
	[ul/min/g]	rat nr/ [min]	-40	-30	-20	-10	10	20	30	40	50	60
		13		2.19007	2.35798	2.21508	3.25116	2.96534	1.7149	1.25045	1.39335	1.4
		14		1.38054	1.09926	2.13385	2.41513	2.60588	3.2	3.2	2.8	2.8
		15	4.93617	4.38298	3.57447	2.89362	3.57447	3.02128	2.34043	2.42553	2.17021
		16		3.62062	3.0303	2.55805	3.81739	3.54191	3.30579	3.34514	1.94805
		17	4.27562	4.52297	4.41696	4.52297	7.5265	5.68905	4.16961	5.97173	5.01767	6.46643
		18	2.48528	3.20471	3.10661	2.64879	3.36821	1.89666	1.66776	3.36821	3.49902	4.67626
	UNaV	Urea bolus
	[µmol/ml/g]	rat nr/ [min]	-40	-30	-20	-10	10	20	30	40	50	60
		13	0.0459914	0.0459914	0.0471597	0.0110754	0.0162558	0.0118614	0.00514469	0.00375134	0.00418006	0.004
		14	0.107682	0.02	0.02	0.02	0.01	0.01	0.01	0.01	0.01	0.01
		15	0.0493617	0.0438298	0.0321702	0.0318298	0.0393191	0.0574043	0.0561702	0.0485106	0.0455745
		16		0.0325856	0.0121212	0.0102322	0.019087	0.0177096	0.0198347	0.0200708	0.0155844
		17	0.0299293	0.0125572	0.0132509	0.0180919	0.0225795	0.0113781	0.00833922	0.0119435	0.0100353	0.0129329
		18	0.0969261	0.022433	0.00621321	0.00529758	0.00336821	0.00189666	0.00166776	0.00336821	0.00349902	0.00467626
	Uosm V/g	Urea bolus	baseline periods (saline infusion)				Urea bolus + Urea infusion
	[µosmol/min/g]	rat nr/ [min]	-40	-30	-20	-10	10	20	30	40	50	60
		13		1.09503	1.30868	1.31797	2.21079	2.29814	1.74062	1.47553	1.77653	1.8
		14		0.607436	0.527643	1.06693	1.18341	1.26385	1.3	1.5	1.5	1.4
		15	4.98553	4.93085	4.53957	4.05685	5.11149	4.45638	3.47553	3.54128	3.20106
		16		2.19048	1.9697	1.68831	2.21409	2.17828	2.2314	2.35832	1.56818
		17	2.52261	2.53237	2.65018	2.66855	4.36537	3.64099	2.60601	3.88163	3.31166	4.33251
		18	1.98692	2.05036	1.85415	2.2567	1.2518	1.1174	1.90304	2.11691	2.1	2.9
		Urea bolus
	UNa
	[mmol/L]	rat nr/ [min]	-40	-30	-20	-10	10	20	30	40	50	60
		13		21	20	5	5	4	3	3	3	3
		14	78	78	16	8	6	6	4	4	3	3
		15	10	10	9	11	11	19	24	20	21	x
		16	x	9	4	4	5	5	6	6	8	x
		17	7	3	3	4	3	2	2	2	2	2
		18	39	7	2	2	1	1	1	1	1	1
	Uosm	Urea bolus	baseline periods (saline infusion)				Urea bolus + Urea infusion
	[mosmol/kg H2O]	rat nr/ [min]	-40	-30	-20	-10	10	20	30	40	50	60
		13		500	555	595	680	775	1015	1180	1275	1275
		14		440	480	500	490	490	485	485	490	490
		15	1010	1125	1270	1402	1430	1475	1485	1460	1475
		16		605	650	660	580	615	675	705	805
		17	590	605	600	590	580	640	625	650	660	670
		18	595	620	660	700	670	660	670	565	605	625
											0.256627
	UKV	Urea bolus
	[µmol/ml/g]	rat nr/ [min]	-40	-30	-20	-10	10	20	30	40	50	60
		13	0.07	0.07	0.06	0.06	0.100786	0.118614	0.066881	0.05	0.05	0.06
		14	0.02	0.02	0.03	0.03	0.03	0.03	0.04	0.04	0.04	0.03
		15	0.56766	0.613617	0.707745	0.651064	0.829277	0.459234	0.287872	0.283787	0.30383
		16		0.314994	0.318182	0.268595	0.404644	0.393152	0.426446	0.454939	0.403247
		17	0.132544	0.0920863	0.0706714	0.0497527	0.0827915	0.0682686	0.0250177	0.0358304	0.030106	0.0323322
		18	0.0969261	0.102551	0.0900916	0.063571	0.0538914	0.0417266	0.0300196	0.047155	0.0664814	0.0748201
	UK	Urea bolus	baseline periods (saline infusion)				Urea bolus + Urea infusion
	[mmol/L]	rat nr/ [min]	-40	-30	-20	-10	10	20	30	40	50	60
		13	31.8182	31.9625	25.4455	27.0871	31	40	39	39.9857	35.8846	42.8571
		14	14.2857	18.1818	16.6667	14.0591	12.4217	11.5124	12.5	12.5	14.2857	10.7143
		15	115	140	198	225	232	152	123	117	140
		16		87	105	105	106	111	129	136	207
		17	31	20.3597	16	11	11	12	6	6	6	5
		18	39	32	29	24	16	22	18	14	19	16

## Sheet: Excretion after Saline
	Effects of saline on renal excretion in anaesthetised Sprague-Dawley rats.
Excretion parameter	Saline bolus	baseline collection periods (saline infusion)				Bolus + saline infusion
V (diuresis)
[µl/min/g]	rat nr/ [min]	-40	-30	-20	-10	10	20	30	40	50	60
1	nr 6	1.6678	1.83799	2.75698	3.3356	3.57386	4.28863	3.30157	2.58679	4.32267
2	nr 7	4.38316	3.13498	4.90566	4.26705	5.10885	4.00581	1.62554	3.97678	3.48331	4.73149
3	nr 8		2.38322	2.19256	2.31967	3.24118	3.00922	3.84493	4.09914	3.6225
4	nr 9	5.75039	6.50869	6.19273	4.36019	5.65561	2.71722	3.94945	3.12796	4.23381	2.62243
5	nr 10		4.18349	5.43119	5.72477	5.98165	5.94495	5.02752	5.3945	5.43119	4.14679
UNa V	Saline bolus
[µmol/min/g]	rat nr/ [min]	-40	-30	-20	-10	10	20	30	40	50	60
1	nr 6	0.103404	0.0771954	0.0606535	0.0633764	0.0643295	0.0771954	0.0627297	0.0543227	0.077808
2	nr 7	0.276139	0.128534	0.196226	0.162148	0.148157	0.108157	0.0975327	0.115327	0.0835994	0.165602
3	nr 8		0.0405148	0.0219256	0.020877	0.0324118	0.0270829	0.0307595	0.0327931	0.0253575
4	nr 9	0.0402528	0.0195261	0.0309637	0.0174408	0.0226224	0.00815166	0.0315956	0.0437915	0.0381043	0.0209795
5	nr 10		0.154789	0.0977615	0.0973211	0.10767	0.107009	0.105578	0.129468	0.146642	0.0995229
Uosm V	Saline bolus	baseline periods (saline infusion)				Bolus + saline infusion
[µosmol/min/g]	rat nr/ [min]	-40	-30	-20	-10	10	20	30	40	50	60
1	nr 6	0.900613	1.23145	2.04016	2.55174	2.78761	3.34513	2.5257	1.9401	2.78812
2	nr 7	1.77518	1.36372	2.18302	1.89884	2.37562	1.92279	0.698984	1.65036	1.55007	2.10552
3	nr 8		1.35844	1.37035	1.48459	2.02574	2.01617	2.64531	3.09485	2.66254
4	nr 9	3.16272	3.67741	3.50509	2.3545	2.61289	1.26351	1.71801	1.39194	1.96872	1.32433
5	nr 10		2.40969	3.47596	4.03596	4.51615	4.90459	4.27339	4.63927	4.50789	3.52477
UNa	Saline bolus
[mmol/L]	rat nr/ [min]	-40	-30	-20	-10	10	20	30	40	50	60
1	nr 6	62	42	22	19	18	18	19	21	18
2	nr 7	63	41	40	38	29	27	60	29	24	35
3	nr 8		17	10	9	10	9	8	8	7
4	nr 9	7	3	5	4	4	3	8	14	9	8
5	nr 10		37	18	17	18	18	21	24	27	24
Uosm	Saline bolus	baseline periods (saline infusion)				Bolus + saline infusion
[mosmol/kg H2O]	rat nr/ [min]	-40	-30	-20	-10	10	20	30	40	50	60
1	nr 6	540	670	740	765	780	780	765	750	645
2	nr 7	405	435	445	445	465	480	430	415	445	445
3	nr 8		570	625	640	625	670	688	755	735
4	nr 9	550	565	566	540	462	465	435	445	465	505
5	nr 10		576	640	705	755	825	850	860	830	850
UKV	Saline bolus
[µmol/min/g]	rat nr/ [min]	-40	-30	-20	-10	10	20	30	40	50	60
1	nr 6	0.033356	0.0496256	0.0689244	0.0767189	0.0571818	0.0428863	0.0330157	0.0206943	0.0302587
2	nr 7	0.0701306	0.0344848	0.0441509	0.0341364	0.035762	0.0280406	0.00650218	0.0238607	0.0208999	0.018926
3	nr 8		0.0372736	0.027836	0.0324118	0.0361106	0.0307595	0.028694	0.0181125	0.0181125
4	nr 9	0.0920063	0.084613	0.0743128	0.0392417	0.0395893	0.0217378	0.0236967	0.0469194	0.0381043	0.0209795
5	nr 10		0.0920367	0.130349	0.125945	0.131596	0.124844	0.10055	0.0917064	0.0868991	0.0746422
UK	Saline bolus	baseline periods (saline infusion)				Bolus + saline infusion
[mmol/L]	rat nr/ [min]	-40	-30	-20	-10	10	20	30	40	50	60
1	nr 6	20	27	25	23	16	10	10	8	7
2	nr 7	16	11	9	8	7	7	4	6	6	4
3	nr 8		15.64	12.6957	13.9726	11.1412	10.2218	7.46281	4.4186	5
4	nr 9	16	13	12	9	7	8	6	15	9	8
5	nr 10		22	24	22	22	21	20	17	16	18
	SE	#DIV/0!	#DIV/0!	#DIV/0!	#DIV/0!	#DIV/0!	#DIV/0!	#DIV/0!	#DIV/0!	#DIV/0!	#DIV/0!
	n	0	0	0	0	0	0	0	0	0	0
