# Supplementary material for: TMAO, a seafood-derived molecule, produces diuresis and reduces mortality in heart failure rats
Source: eLife. 2020 Jun 8;9:e57028. doi: 10.7554/eLife.57028 (PMC7334024; doi:10.7554/eLife.57028)
Supplement: Figure 10—source data 1. [file elife-57028-fig10-data1.xlsx]

## Sheet: Arkusz1
LDH incubated at constant atmospheric pressure for 24 hrs or LDH exposed to pressure oscillation for 24 hrs with or without TMAO.
Figure 14 A				Figure 14-figure supplement 1					Figure 14 B
	D [µm2/s]	SD			D [µm2/s]	SD			series 1			series 2			series 3
PBS, atmospheric pressure	49.3333	3.85861		PBS, atmospheric pressure	69	3.45			temperature	D/D0 (LDH in PBS)	D/D0 (LDH in PBS with 1M TMAO)	temperature	D/D0 (LDH in PBS)	D/D0 (LDH in PBS with 1M TMAO)	temperature	D/D0 (LDH in PBS)	D/D0 (LDH in PBS with 1M TMAO)
PBS, pressure oscillations	47.6667	4.18994		PBS, pressure oscillations	62	3.1			25	1	1	25	1	1	25	1	1
PBS + 1M TMAO, pressure oscillations	53.6667	3.85861		PBS + 1M TMAO, pressure oscillations	67	3.35			50	1.04255	0.96774	50	1.09286	0.9913	55	0.98758	1.016
									60	1.25532	1.12903	54	1.04286	0.96522	60	1.1118	1.04
									70	1.6383	1.19355	58	1.05	-	65	0.6646	0.92
									80	1.61702	1.32258	62	1.05714	0.96522	70	0.29814	0.616
												66	0.77143	0.77391
												70	0.75	-
												74	0.57857	-
