# Supplementary material for: TMAO, a seafood-derived molecule, produces diuresis and reduces mortality in heart failure rats
Source: eLife. 2020 Jun 8;9:e57028. doi: 10.7554/eLife.57028 (PMC7334024; doi:10.7554/eLife.57028)
Supplement: Figure 12—source data 1. [file elife-57028-fig12-data1.xlsx]

## Sheet: Sheet1
oscillation profile constructed from the position of the liquid meniscus in the microchannel as a function of time for various pressure differences Δp=p1-p2
Figure 3d
frame number	time* (s)	meniscus dispalcement (µm) at Δp=100mbar	meniscus dispalcement (µm) at Δp=200mbar	meniscus dispalcement (µm) at Δp=300mbar
1	0.0142694	-0.1	-0.598	-0.43		*time = (frame number / frame rate)
2	0.0285714	-0.276	-0.524	-0.365		Recording speed (frame rate of the camera) = 70.06 fps
3	0.0428571	-0.107	-0.487	-0.786
4	0.0571429	-0.199	-0.401	-0.527
5	0.0714286	7.883	-0.513	-0.163
6	0.0857143	56.022	156.488	220.875
7	0.1	55.225	157.61	220.159
8	0.114286	5.348	158.721	90.395
9	0.128571	0.269	11.106	4.006
10	0.142857	-0.019	0.275	-0.412
11	0.157143	0.039	-0.426	-0.645
12	0.171429	-0.109	-0.504	-0.495
13	0.185714	-0.131	-0.891	-1.355
14	0.2	-0.262	-0.658	-1.357
15	0.214286	-0.377	-1.172	-1.589
16	0.228571	-0.44	-1.489	-1.631
17	0.242857	-0.419	-1.069	-1.707
18	0.257143	-0.355	-1.109	-1.923
19	0.271429	-0.438	-1.195	-2.111
20	0.285714	0.056	-1.226	216.447
21	0.3	55.846	131.098	220.507
22	0.314286	55.663	157.376	220.072
23	0.328571	7.017	157.624	87.84
24	0.342857	0.124	34.518	41.922
25	0.357143	0.091	7.642	23.327
26	0.371429	-0.006	3.727	19.698
27	0.385714	-0.235	3.048	18.233
28	0.4	-0.188	3.385	16.611
29	0.414286	-0.277	3.247	16.022
30	0.428571	-0.339	3.476	16.306
31	0.442857	-0.419	3.286	16.201
32	0.457143	-0.273	3.061	16.029
33	0.471429	-0.44	3.408	15.636
34	0.485714	-0.315	2.992	15.71
35	0.5	-0.439	3.016	221.309
36	0.514286	54.715	3.351	220.529
37	0.528571	55.691	11.988	220.579
38	0.542857	56.601	157.227	100.073
39	0.557143	1.647	159.482	28.502
40	0.571429	0.01	53.566	23.494
41	0.585714	-0.099	14.695	23.127
42	0.6	-0.336	10.318	22.901
43	0.614286	-0.312	9.235	22.697
44	0.628571	-0.295	9.353	22.831
45	0.642857	-0.462	9.68	22.385
46	0.657143	-0.398	9.559	22.573
47	0.671429	-0.4	9.619	22.73
48	0.685714	-0.418	9.288	22.702
49	0.7	-0.456	9.423	22.771
50	0.714286	-0.356	9.423	22.738
51	0.728571	0.542	9.21	220.477
52	0.742857	55.435	129.647	220.651
53	0.757143	56.384	158.651	220.572
54	0.771429	4.334	160.304	57.655
55	0.785714	0.145	35.181	39.575
56	0.8	-0.001	10.39	38.288
57	0.814286	-0.169	8.464	37.86
58	0.828571	-0.337	7.987	37.517
59	0.842857	-0.339	7.286	37.371
60	0.857143	-0.484	7.129	37.206
61	0.871429	-0.398	7.137	37.09
62	0.885714	-0.439	7.105	36.963
63	0.9	-0.461	7.223	37.043
64	0.914286	-0.36	7.168	37.033
65	0.928571	-0.441	7.404	36.968
66	0.942857	-0.418	7.009	220.918
67	0.957143	56.272	140.975	220.451
68	0.971429	56.075	159.645	220.676
69	0.985714	5.634	160.355	127.838
70	1	0.135	32.96	41.72
71	1.01429	-0.164	9.853	31.339
72	1.02857	-0.401	7.781	31.219
73	1.04286	-0.59	6.722	30.935
74	1.05714	-0.71	6.338	30.879
75	1.07143	-0.645	6.635	30.639
76	1.08571	-0.704	6.347	30.649
77	1.1	-0.725	6.412	30.429
78	1.11429	-0.687	6.381	30.488
79	1.12857	-0.746	6.002	30.206
80	1.14286	-0.725	6.26	30.411
81	1.15714	-0.725	5.782	220.903
82	1.17143	56.386	6.248	220.615
83	1.18571	55.578	159.152	220.864
84	1.2	5.634	160.382	79.297
85	1.21429	0.429	75.374	66.719
86	1.22857	0.246	14.436	61.534
87	1.24286	0.044	10.739	59.932
88	1.25714	-0.152	9.343	59.595
89	1.27143	-0.232	9.385	59.163
90	1.28571	-0.356	9.253	58.52
91	1.3	-0.105	9.099	58.167
92	1.31429	-0.339	9.027	57.908
93	1.32857	-0.395	9.157	58.059
94	1.34286	-0.462	8.623	57.791
95	1.35714	-0.372	9.208	57.733
96	1.37143	-0.439	8.866	220.672
97	1.38571	55.944	101.841	220.038
98	1.4	55.748	159.682	219.957
99	1.41429	56.327	160.516	95.225
100	1.42857	1.712	46.873	39.203
101	1.44286	0.528	10.85	29.799
102	1.45714	0.27	9.043	28.803
103	1.47143	-0.024	8.299	28.742
104	1.48571	-0.166	8.62	28.485
105	1.5	-0.112	8.405	28.564
106	1.51429	-0.234	8.576	28.355
107	1.52857	-0.317	8.203	28.322
108	1.54286	-0.402	8.419	28.538
109	1.55714	-0.313	8.144	28.44
110	1.57143	-0.392	7.968	28.551
111	1.58571	-0.415	8.441	221.302
112	1.6	39.958	8.28	220.403
113	1.61429	55.57	8.361	220.813
114	1.62857	55.917	159.738	85.123
115	1.64286	1.967	160.599	40.813
116	1.65714	0.214	86.777	30.545
117	1.67143	0.271	11.993	29.126
118	1.68571	-0.064	9.356	28.757
119	1.7	-0.045	9.095	28.408
120	1.71429	-0.232	8.388	28.257
121	1.72857	-0.315	8.421	28.123
122	1.74286	-0.376	8.728	28.173
123	1.75714	-0.398	8.432	28.19
124	1.77143	-0.337	8.319	28.073
125	1.78571	-0.339	8.444	28.034
126	1.8	-0.231	8.394	220.701
127	1.81429	1.721	8.241	220.973
128	1.82857	56.151	8.213	220.265
129	1.84286	56.111	152.006	75.136
130	1.85714	5.473	160.145	27.329
131	1.87143	0.361	161.663	17.271
132	1.88571	0.129	20.169	16.59
133	1.9	-0.043	6.376	16.623
134	1.91429	-0.02	4.432	16.28
135	1.92857	-0.108	3.484	16.146
136	1.94286	-0.252	3.588	16.183
137	1.95714	-0.236	3.169	15.935
138	1.97143	-0.257	2.909	15.805
139	1.98571	-0.316	3.201	15.605
140	2	-0.312	3.287	15.605
141	2.01429	-0.336	2.957	221.035
142	2.02857	-0.238	3.145	220.737
143	2.04286	56.539	3.231	220.337
144	2.05714	56.669	2.884	46.646
145	2.07143	11.543	159.414	20.024
146	2.08571	0.576	161.452	14.425
147	2.1	0.235	105.354	12.686
148	2.11429	0.212	9.061	12.055
149	2.12857	-0.088	4.583	11.535
150	2.14286	-0.071	3.656	11.199
151	2.15714	-0.089	3.294	10.849
152	2.17143	-0.194	2.983	10.948
153	2.18571	-0.234	2.921	10.658
154	2.2	-0.356	2.715	10.913
155	2.21429	-0.356	2.61	10.722
156	2.22857	-0.164	2.639	10.731
157	2.24286	-0.123	2.499	221.734
158	2.25714	56.768	2.489	220.574
159	2.27143	56.541	2.697	220.22
160	2.28571	31.598	159.575	116.092
161	2.3	0.728	161.763	31.012
162	2.31429	0.458	106.718	24.667
163	2.32857	0.398	8.661	23.252
164	2.34286	0.396	4.659	22.902
165	2.35714	0.1	4.36	22.647
166	2.37143	0.164	3.58	22.532
167	2.38571	0.063	3.578	22.119
168	2.4	0.188	3.191	21.72
169	2.41429	0.099	3.569	21.532
170	2.42857	-0.07	3.382	21.12
171	2.44286	0.162	3.131	21.29
172	2.45714	0.113	3.018	221.234
173	2.47143	56.423	3.299	220.382
174	2.48571	55.924	2.962	220.033
175	2.5	7.367	160.138	111.903
176	2.51429	0.806	161.862	42.035
177	2.52857	0.619	162.267	32.484
178	2.54286	0.606	23.384	29.712
179	2.55714	0.455	8.219	29.32
180	2.57143	0.458	6.853	28.924
181	2.58571	0.293	5.805	28.348
182	2.6	0.057	5.859	28.39
183	2.61429	0.211	5.983	28.23
184	2.62857	0.338	5.615	28.194
185	2.64286	0.102	5.498	28.184
186	2.65714	-0.147	5.305	28.087
187	2.67143	0.116	5.622	28.189
188	2.68571	56.044	5.375	220.197
189	2.7	56.412	5.363	220.058
190	2.71429	56.151	5.256	220.581
191	2.72857	0.447	11.095	86.101
192	2.74286	0.444	159.818	79.229
193	2.75714	0.727	161.189	73.811
194	2.77143	0.498	69.466	69.94
195	2.78571	0.498	6.714	67.29
196	2.8	0.266	5.81	65.909
197	2.81429	0.29	5.393	65.427
198	2.82857	0.315	5.086	64.611
199	2.84286	0.129	5.328	64.492
200	2.85714	0.051	5.226	64.366
201	2.87143	0.073	5.107	63.923
202	2.88571	0.086	5.2	64.014
203	2.9	56.412	5.159	220.292
204	2.91429	56.146	5.212	219.327
205	2.92857	56.209	5.036	220.551
206	2.94286	2.137	28.785	81.244
207	2.95714	0.444	160.439	50.727
208	2.97143	0.378	162.179	44.887
209	2.98571	0.257	59.839	44.717
210	3	0.268	6.715	44.779
211	3.01429	0.142	5.607	44.366
212	3.02857	0.184	5.219	44.128
213	3.04286	0.245	4.883	44.134
214	3.05714	0.381	4.958	44.212
215	3.07143	0.103	5.243	44.108
216	3.08571	0.127	5.366	44.081
217	3.1	-0.006	5.038	44.438
218	3.11429	8.283	4.953	219.35
219	3.12857	56.156	4.824	217.622
220	3.14286	55.769	4.844	218.139
221	3.15714	2.264	4.712	80.982
222	3.17143	0.609	153.517	46.05
223	3.18571	0.444	161.223	42.347
224	3.2	0.417	162.609	41.707
225	3.21429	0.351	19.217	41.646
226	3.22857	0.161	4.758	41.847
227	3.24286	0.234	3.867	41.695
228	3.25714	0.181	3.743	41.755
229	3.27143	0.118	3.489	41.629
230	3.28571	0.208	3.349	41.718
231	3.3	0.058	2.968	41.669
232	3.31429	0.205	3.235	117.092
233	3.32857	3.503	2.723	216.898
234	3.34286	56.098	2.587	216.539
235	3.35714	56.113	2.551	218.756
236	3.37143	3.932	2.725	37.895
237	3.38571	0.601	156.887	18.89
238	3.4	0.407	161.244	16.855
239	3.41429	0.339	162.648	16.7
240	3.42857	0.182	14.25	16.415
241	3.44286	0.162	3.876	16.31
242	3.45714	0.251	2.881	16.351
243	3.47143	0.036	2.528	15.908
244	3.48571	0.063	2.481	15.889
245	3.5	0.124	2.635	15.884
246	3.51429	0.231	2.192	15.611
247	3.52857	0.039	2.169	15.591
248	3.54286	3.944	2.141	210.646
249	3.55714	55.923	2.037	216.664
250	3.57143	55.59	2.377	216.65
251	3.58571	4.771	2.178	134.322
252	3.6	0.454	152.913	15
253	3.61429	0.397	160.944	20.086
254	3.62857	0.415	162.509	14.179
255	3.64286	0.354	21.251	13.693
256	3.65714	0.397	8.785	13.43
257	3.67143	0.207	8.298	13.186
258	3.68571	0.184	7.858	13.125
259	3.7	0.081	7.405	12.684
260	3.71429	0.165	7.347	12.555
261	3.72857	0.229	7.398	12.621
262	3.74286	0.102	7.325	12.524
263	3.75714	0.169	7.219	12.441
264	3.77143	55.901	7.532	199.678
265	3.78571	56.32	7.446	216.978
266	3.8	56.357	7.346	216.853
267	3.81429	2.402	157.653	132.761
268	3.82857	0.726	161.988	25.48
269	3.84286	0.583	163.178	18.379
270	3.85714	0.522	15.711	16.864
271	3.87143	0.545	9.213	16.441
272	3.88571	0.399	8.112	16.309
273	3.9	0.36	7.539	15.927
274	3.91429	0.264	7.732	15.649
275	3.92857	0.201	7.525	15.645
276	3.94286	0.188	7.498	15.501
277	3.95714	0.105	7.309	15.507
278	3.97143	0.227	7.2	15.401
279	3.98571	0.257	7.313	15.395
280	4	0.305	7.337	15.33
281	4.01429	0.057	7.236	15.371
282	4.02857	0.14	7.073	15.333
283	4.04286	0.148	7.124	15.227
284	4.05714	0.018	7.001	15.376
285	4.07143	-0.042	7.327	15.36
286	4.08571	0.036	7.431	15.328
287	4.1	0.074	7.606	15.347
288	4.11429	0.216	7.267	15.282
289	4.12857	0.174	7.551	15.245
290	4.14286	0.378	7.535	15.352
291	4.15714	0.401	7.195	15.326
292	4.17143	-0.104	7.152	15.252
293	4.18571	0.255	7.218	15.274
294	4.2	-0.029	7.052	15.116
295	4.21429	0.009	7.203	15.382
296	4.22857	0.199	7.185	15.37
297	4.24286	-0.004	7.215	15.258
298	4.25714	0.108	6.991	15.267
299	4.27143	0.127	7.094	15.161
300	4.28571	-0.004	6.969	16
301	4.3	-0.015	7.076	15.172
302	4.31429	-0.04	7.183	15.06
303	4.32857	0.108	7.007	15.307
304	4.34286	0.081	6.923	15.176
305	4.35714	0.097	7.038	14.957
306	4.37143	0.157	7.102	14.819
307	4.38571	0.093	6.858	14.741
308	4.4	0.146	6.885	14.742
309	4.41429	0.233	6.654	14.602
310	4.42857	0.06	7.124	14.542
311	4.44286	0.002	7.024	14.557
312	4.45714	0.065	6.722	14.454
313	4.47143	0.153	6.972	14.448
314	4.48571	0.106	6.967	14.599
315	4.5	0.142	6.73	14.451
316	4.51429	0.037	--	14.346
317	4.52857	0.111	--	14.282
318	4.54286	0.231	--	--
319	4.55714	-0.087	--	--
320	4.57143	0.284	--	--
321	4.58571	0.185	--	--
322	4.6	0.3	--	--
323	4.61429	0.076	--	--
324	4.62857	0.22	--	--
325	4.64286	-0.008	--	--
326	4.65714	0.094	--	--
327	4.67143	0.196	--	--
328	4.68571	0.231	--	--
329	4.7	-0.027
330	4.71429	0.288
331	4.72857	0.23
332	4.74286	0.047
333	4.75714	0.05
334	4.77143	0.083
335	4.78571	-0.02
336	4.8	0.192
337	4.81429	0.081
338	4.82857	0.271
339	4.84286	0.223
340	4.85714	0.35
341	4.87143	0.245
342	4.88571	--
343	4.9	--
344	4.91429	--
345	4.92857	--
		--
		--
		--
		--
		--
		--
		--
		--
