# Supplementary material for: TMAO, a seafood-derived molecule, produces diuresis and reduces mortality in heart failure rats
Source: eLife. 2020 Jun 8;9:e57028. doi: 10.7554/eLife.57028 (PMC7334024; doi:10.7554/eLife.57028)
Supplement: Table 1—source data 1. [file elife-57028-table1-data1.xlsx]

## Sheet: energy and water balance
Metabolic, renal and cardiovascular parameters in 58-week-old normotensive Sprague-Dawley rats maintained on either Water or TMAO solution in drinking water.
SD-Water	Body mass	24hr food	24hour water	24hr urine	Tibia [cm]
SDW1	412	22.9	39.8	13	4.243
SDW2	508	17.4	31.9	19.6	4.31
SDW3	397	21.1	36.3	18.8	4.288
SDW4	435	19.3	40.2	22.2	4.405
SDW5	493	14.8	17.2	18.7	4.269
SDW6	424	21.8	21.4	19.6	4.332
SDW7	397	19.6	43.5	18.75	4.25
SDW8	492	21.4	28.4	17.9	4.42
SDW9	449	17.5	39.8	20.1	4.12
SDW10	457	24.1	17.1	17.9	4.45
TMAO
SD-TMAO	Body mass	24hr food	24hour water	24hr urine	Tibia [cm]
SDT1	438.1	20.4	39.7	17.7	4.368
SDT2	517.8	21.6	30.3	24.3	4.275
SDT3	424.4	24.2	39.1	19	4.071
SDT4	468.7	20.5	30.7	34.7	4.074
SDT5	416.8	21.4	34.9	27.6	4.366
SDT6	438.7	20.8	44.6	18.6	4.367
SDT7	496.2	19.7	32.2	22.4	4.483
SDT8	437.5	16.9	33.7	12.8	4.096
SDT9	485	26.7	44.1	29.6	4.282
SDT10	405.4	22.7	37.3	19.9	4.088

## Sheet: TMAO
SD-Water	plasma TMAO [µM]		TMAO urine 24hr [µmoles]
SDW1	5.63		5.43667
SDW2	6.4573		6.28257
SDW3	6.53825		8.18923
SDW4	6.9956		2.62547
SDW5	l/d		l/d				l/d - lost/damaged/too small sample
SDW6	7.45		6.258
SDW7	7.11347		6.02338
SDW8	5.58		5.56918
SDW9	6.93		6.89
SDW10	6.24		6.39
SD-TMAO
SDT1	19.15		70.6611
SDT2	54.35		95.3949
SDT3	66.57		201.797
SDT4	17.95		176.797
SDT5	10.68		75.5789
SDT6	65.4		138.954
SDT7	46.21		91.8875
SDT8	37.46		116.271
SDT9	l/d		27.4048
SDT10	39.81		35.782

## Sheet: Heart mass
SD-Water	heart mass [g]
SDW1	1.454
SDW2	1.373
SDW3	1.333
SDW4	1.449
SDW5	1.538
SDW6	1.505
SDW7	1.52
SDW8	1.48
SDW9	1.39
SDW10	1.4
SD-TMAO
SDT1	1.318
SDT2	1.516
SDT3	1.352
SDT4	1.457
SDT5	1.484
SDT6	1.504
SDT7	1.224
SDT8	1.562
SDT9	1.707
SDT10	1.492

## Sheet: Echo
SD-Water	lv edv	lv esv	IVSs	Ivsd	SV	EF
SDW1	0.52	0.14	0.33	0.22	0.38	74
SDW2	0.54	0.13	0.34	0.21	0.41	75
SDW3	0.61	0.15	0.32	0.21	0.47	77
SDW4	0.26	0.09	0.4	0.26	0.23	80
SDW5	0.24	0.06	0.38	0.22	0.19	76
SDW6	0.62	0.17	0.33	0.29	0.42	71
SDW7	x	x	x	x	x	x
SDW8	0.44	0.13	0.42	0.23	0.35	79
SDW9	0.49	0.11	0.28	0.25	0.39	73
SDW10	x	x	x	x	x	x
										x - echo failure
SD-TMAO	lv edv	lv esv	IVSs	Ivsd	SV	EF
SDT1	0.72	0.16	0.36	0.23	0.56	77
SDT2	x	x	x	x	x	x
SDT3	x	x	x	x	x	x
SDT4	0.37	0.11	0.35	0.25	0.26	69
SDT5	0.49	0.15	0.32	0.3	0.34	69
SDT6	0.64	0.13	0.33	0.25	0.51	79
SDT7	0.62	0.14	0.4	0.26	0.48	81
SDT8	0.56	0.13	0.3	0.21	0.43	76
SDT9	0.58	0.07	0.37	0.24	0.51	79
SDT10	0.56	0.11	0.33	0.25	0.45	87

## Sheet: arterial pressure
SD-Water	systolic	diastolic	HR
SDW1	135.97	77.8716	336.385
SDW2	121.934	67.8138	309.406
SDW3	114.305	61.1508	275.071
SDW4	138.667	99.6555	380.998
SDW5	137.76	97.9019	375.386
SDW6	x	x	x
SDW7	125.212	82.15	395
SDW8	132.58	76.658	302.875
SDW9	x	x	x
SDW10	131.35	81.25	295.987
						X - measurement failure
SD-TMAO	systolic	diastolic	HR
SDT1	125.863	92.4396	365.882
SDT2	124.835	99.7564	358.671
SDT3	138.9	91.52	371
SDT4	138.805	90.3561	374.305
SDT5	129.141	81.7994	365.528
SDT6	127.578	70.9266	366.265
SDT7	x	x	x
SDT8	129.264	79.1643	348.204
SDT9	x	x	x
SDT10	102.187	86.9409	365.242

## Sheet: Left ventricle
SD-Water	LVEDP	dp/dt	minusdp/dt
SDW1	4.95349	6.37224	5.2
SDW2	2.86174	5.96592	5.8
SDW3	4.53891	7.28165	4.32			X - measurement failure
SDW4	3.58	6.75	5.02
SDW5	x	x	x
SDW6	x	x	x
SDW7	4.16	4.98	5.6
SDW8	4.65	7.87	4.08
SDW9	x	x	x
SDW10	x	x	x
SD-TMAO
SDT1	5.29435	5.34688	5.52
SDT2	3.46669	7.0803	4.58
SDT3	2.60734	7.87485	4.87
SDT4	4.37103	6.58625	5.88
SDT5	4.41099	9.38122	5.48
SDT6	4.63008	7.3857	5.03
SDT7	x	x	x
SDT8	4.96631	7.49531	5.485
SDT9	x	x	x
SDT10	X	X	x

## Sheet: plasma NT
SD-Water	NT-proBNP [pg/ml]
SDW1	lqq
SDW2	29.3881
SDW3	9.32509
SDW4	30.9684
SDW5	29.4931			l/d - lost/damaged/too small sample
SDW6	25.2655
SDW7	l/d
SDW8	18.527
SDW9	30.5699
SDW10	l/d
SD-TMAO	NT-proBNP [pg/ml]
SDT1	10.1259
SDT2	34.9034
SDT3	14.2517
SDT4	18.0505
SDT5	19.4309
SDT6	l/d
SDT7	13.8907
SDT8	12.5249
SDT9	25.7392
SDT10	l/d

## Sheet: Hormones
SD-Water			Vasopressin [ng/ml]						Aldosteron [pg/ml]					Ang II [pg/ml]
SDW1			l/d						977.385					310.46
SDW2			l/d						776.004					236.51
SDW3			0.32155						876.659					201.128
SDW4			0.152533						1030.95					lqq			lqq - below the limit of quantification
SDW5			3.03451						863.91					l/d			l/d - lost/damaged/too small sample
SDW6			l/d						l/d					259.571
SDW7			0.376772						l/d					218.995
SDW8			0.785						958.458					258.268
SDW9			0.857						l/d					229.588
SDW10			0.941046						795.983					l/d
SD-TMAO	Vasopressin [ng/ml]								Aldosteron [pg/ml]					Ang II [pg/ml]
SDT1			2.06799						875.756					298.852
SDT2			1.9558						l/d					332.875
SDT3			1.7859						962.342					178.777
SDT4			l/d						895.38					195.834
SDT5			0.987						1001.26					278.25
SDT6			1.27696						l/d					232.527
SDT7			1.258						841.817					167.481
SDT8			l/d						864.193					315.994
SDT9			2.12865						l/d					lqq
SDT10			2.78469						1038.51					l/d
mean			1.78062						925.608					250.074
sd			0.585444						75.2893					64.9496

## Sheet: Electrolyte balance
SD-Water	Na serum (mM)	24hr Na urine ex [mmol]	K serum [mM]	24hr K urine ex [mmol]	Serum Creatinine clearens [ml/min]
SDW1	l/d	1.76	l/d	2.74296	l/d
SDW2	137	2.21	4.77	3.85424	1.20892
SDW3	138	1.892	5.11	2.7467	1.0408			l/d - lost/damaged/too small sample
SDW4	138	1.68	4.88	2.80112	1.33167
SDW5	138	1.512	7.16	2.29788	0.827841
SDW6	143	1.488	4.44	2.55712	1.3354
SDW7	l/d	l/d	l/d	l/d	l/d
SDW8	137	1.89	5.35	2.856	1.105
SDW9	l/d	1.775	l/d	2.014	l/d
SDW10	141	1.598	5.15	3.625	1.215
TMAO
SD-TMAO	Na serum [mM]	24hr Na urine ex [mmol]	K serum [mM]	24hr K urine ex [mmol]	Serum Creatinine clearens [ml/min]
SDT1	139	2.436	5.04	3.57	1.35861
SDT2	l/d	1.992	5.25	3.24912	1.01682
SDT3	138	2.46	5.43	3.072	1.3119
SDT4	138	1.806	4.86	2.40744	0.960556
SDT5	141	2.184	5.32	3.14232	1.44708
SDT6	136	1.89	4.1	3.28608	1.11892
SDT7	139	2.04	4.88	3.0852	1.0196
SDT8	139	1.892	5.36	2.71788	1.00765
SDT9	137	2.016	5.99	2.51664	1.02
SDT10	l/d	2.11	l/d	2.9436	l/d
