# Supplementary material for: TMAO, a seafood-derived molecule, produces diuresis and reduces mortality in heart failure rats
Source: eLife. 2020 Jun 8;9:e57028. doi: 10.7554/eLife.57028 (PMC7334024; doi:10.7554/eLife.57028)
Supplement: Table 2—source data 1. [file elife-57028-table2-data1.xlsx]

## Sheet: energy and water balance
Metabolic, renal and cardiovascular parameters in Spontaneously Hypertensive Heart Failure (SHHF) rats maintained on either Water or TMAO solution in drinking water.
SHHF-WATER	Body mass (g)	24hr food (g)	24hour water (mL)	24hr urine (mL)	tibia lenght (cm)
SW1	489	20.9	36.7	14.9	4
SW2	452	23.3	40.6	16.8	3.8
SW3	468	21.3	33.9	16	4.2
SW4	d	d	d	d	d
SW5	478	27.8	33.1	13.9	3.7
SW6	465	19.7	29.7	9.7	4.2
SW7	d	d	d	d	d
SW8	499	26.4	50.7	17.6	3.8
SW9	d	d	d	d	d
							d-died before meassurment
SHHF-TMAO
ST1	490	22.8	30.4	15.9	3.9
ST2	470	23.2	45.8	19.1	4.1
ST3	465	26.7	49.2	17.1	4
ST4	489	26.5	47.5	22.6	4
ST5	458	22.9	37.5	20.1	3.8
ST6	488	22.5	32	16.8	4.1
ST7	482	20.5	42	14.2	3.9
ST8	465	25.5	44.7	17.8	4.1
ST9	480	27.1	40.9	17.5	d

## Sheet: TMAO
SHHF-WATER	TMAO plasma (µmol/L)	TMAO urine (µmol/L)	TMAO urine 24hr (µmoles)
SW1	5.62427	617.975	9.20783
SW2	6.8	596.284	10.0176
SW3	5.43653	739.103	11.8256
SW4	d	d	d
SW5	9.53333	886.805	15.6078
SW6	6.13867	421.094	5.8532
SW7	d	d	d
SW8	6.72	750.309	7.278
SW9	d	d	d
											d-died before meassurment
											l/d - lost/damaged/too small sample
SHHF-TMAO
ST1	28.6279	5865.15	93.2559
ST2	23.5361	7563.41	144.461
ST3	19.9089	10932.5	186.946
ST4	12.0113	5507.03	124.459
ST5	29.5972	5891.58	118.421
ST6	12.7831	5382.69	90.4292
ST7	l/d	l/d	l/d
ST8	15.7531	9113.04	129.405
ST9	d	d	d

## Sheet: Heart mass
SHHF-WATER	heart mass (g)
SW1	1.513
SW2	1.672
SW3	1.778
SW4	d
SW5	2.414
SW6	1.88
SW7	d
SW8	1.972
SW9	d
					d-died before meassurment
SHHF-TMAO
ST1	2.077
ST2	1.72
ST3	1.744
ST4	1.794
ST5	1.599
ST6	1.73
ST7	2.002
ST8	1.09
ST9	d

## Sheet: arterial pressure
SHHF-WATER	systolic (mmHg)	diastolic (mmHg)	HR (beats/min)
SW1	139.926	95.5903	299.733
SW2	129.926	104.474	259.296
SW3	147.251	106.336	288.103
SW4	d	d	d
SW5	125.82	85.977	420.109
SW6	153.521	98.2751	265.733
SW7	d	d	d
SW8	120.822	101.212	351.529
SW9	d	d	d
										d-died before meassurment
SHHF-TMAO
ST1	116.425	85.6533	325.509
ST2	112.479	84.4088	326.144
ST3	142.78	98.6156	281.933
ST4	126.784	90.8417	300.085
ST5	148.951	83.9791	300.26
ST6	124.878	90.3377	299.166
ST7	121.551	86.3826	268.596
ST8	120.762	80.4407	315.536
ST9	d	d	d

## Sheet: Echo
SHHF-WATER	lv edv (mL)	lv esv (mL)	IVSs (cm)	Ivsd (cm)	SV (mL)	EF (%)
SW1	0.21	0.1	0.41	0.31	0.11	0.52381
SW2	0.25	0.2	0.41	0.22	0.19	0.76
SW3	0.29	0.11	0.41	0.35	0.18	0.62069
SW4	d	d	d	d	d	d
SW5	0.42	0.04	0.39	0.24	0.28	0.666667
SW6	x	x	x	x	x	x
SW7	d	d	d	d	d	d
SW8	0.68	0.24	0.41	0.31	0.43	0.632353
SW9	d	d	d	d	d	d
									d-died before meassurment
SHHF-TMAO									x - echo failure
ST1	0.29	0.02	0.45	0.35	0.22	0.758621
ST2	0.46	0.14	0.36	0.24	0.32	0.695652
ST3	0.51	0.09	0.35	0.27	0.42	0.823529
ST4	0.25	0.08	0.4	0.33	0.17	0.68
ST5	0.89	0.34	0.27	0.24	0.55	0.617978
ST6	0.54	0.18	0.24	0.21	0.36	0.666667
ST7	0.58	0.17	0.25	0.16	0.41	0.706897
ST8	0.63	0.18	0.45	0.32	0.45	0.714286
ST9	d	d	d	d	d	d
			,

## Sheet: Left ventricle
SHHF-WATER	LVEDP (mmHg)	+dP/dT (mmHg/ms)	+dP/dT-EDV (mmHg/ms)
SW1	2.90839	6.0166	2.1852
SW2	3.98827	6.34236	2.3805
SW3	3.29782	6.40576	2.43215
SW4	d	d	d
SW5	x	x	x
SW6	1.89052	4.26108	1.98741
SW7	d	d	d
SW8	3.39317	6.3689	2.74549
SW9	d	d	d
									d-died before meassurment
									x - measurment failure
SHHF-TMAO
ST1	3.29887	6.11466	2.49492
ST2	4.05206	4.93722	2.12636
ST3	2.34432	5.43151	1.88543
ST4	2.62645	7.28336	2.81722
ST5	1.64817	5.6305	3.81812
ST6	2.42133	4.45536	1.9787
ST7	x	x	x
ST8	7.46614	4.61946	2.73388
ST9	d	d	d

## Sheet: plasma NT
SHHF-WATER	NT-proBNP (pg/mL)
SW1	45.5362
SW2	46.0279
SW3	44.6465
SW4	d
SW5	45.5594
SW6	49.1685
SW7	d
SW8	82.6209
SW9	d
									d-died before meassurment
SHHF-TMAO	NT-proBNP
ST1	49.5544
ST2	50.8073
ST3	26.3811
ST4	31.5968
ST5	38.953
ST6	45.4463
ST7	51.7849
ST8	47.8399
ST9	d

## Sheet: Electrolyte balance
SHHF-WATER	Na serum (mmol/L)	24 hr Na excretion (mmoles)	K serum (mmol/L)	24 hr K excretion (mmoles)	Serum creatinine clearance (mL/min)
SW1	136.957	1.2218	4.33333	2.60288	0.313645
SW2	142.174	1.7472	4.61538	3.41074	0.440481
SW3	142.174	1.792	4.53846	3.10192	0.392622
SW4	d	d	d	d	d
SW5	147.391	1.1264	5.25641	3.12418	0.72864
SW6	142.609	1.3622	4.97436	2.86757	0.363845
SW7	d	d	d	d	d
SW8	142.866	1.2416	4.68325	2.23304	0.258554
SW9	d	d	d	d	d
									d-died before meassurment
									l/d - lost/damaged/too small sample
SHHF-TMAO
ST1	140.435	1.3515	4.41026	3.27922	0.499574
ST2	141.739	1.9864	4.25641	3.79383	0.601237
ST3	138.261	1.8468	4.28205	3.4542	0.442614
ST4	139.565	2.486	4.23077	4.41966	0.5198
ST5	140.435	2.0301	5	3.44574	0.576479
ST6	139.13	2.0328	4.64103	3.09977	0.519533
ST7	l/d	1.6614	4.58974	2.60613	0.546043
ST8	132.609	2.0648	l/d	3.10877	l/d
ST9	d	d	d	d	d

## Sheet: Hormones
SHHF-WATER	ang (pg/mL)	ald (pg/mL)	avp (pg/mL)
SW1	325.602	879.738	4308.59
SW2	273.262	1111.83	3688.4
SW3	297.638	750.457	2859.42
SW4	d	d	d
SW5	352.829	1004.84	3239.07
SW6	319.275	l/d	1016.64
SW7	d	d	d
SW8	385.724	336.91	l/d
SW9	d	d	d
								d-died before meassurment
								l/d - lost/damaged/too small sample
SHHF-TMAO
ST1	198.138	594.708	2718.14
ST2	288.402	741.605	3056.43
ST3	291.446	665.963	2895.48
ST4	249.399	653.64	4893.15
ST5	328.128	970.036	2196.48
ST6	286.159	981.311	1965.59
ST7	279.235	730.455	4053.44
ST8	292.987	729.775	l/d
ST9	d	d	d

## Sheet: TNF
WATER	TNF (pg/mL)
SW1	21.4602
SW2	10.1366
SW3	50.418
SW4	d					d-died before meassurment
SW5	76.3275					l/d - lost or damaged
SW6	18.1136
SW7	d
SW8	30.9035
SW9	d
TMAO
ST1	24.9242
ST2	19.2417
ST3	l/d
ST4	27.1741
ST5	13.3812
ST6	28.9523
ST7	l/d
ST8	36.1783
ST9	d

[truncated: 1 more sheets: IL-10]
