# Supplementary material for: TMAO, a seafood-derived molecule, produces diuresis and reduces mortality in heart failure rats
Source: eLife. 2020 Jun 8;9:e57028. doi: 10.7554/eLife.57028 (PMC7334024; doi:10.7554/eLife.57028)
Supplement: Table 3—source data 1. [file elife-57028-table3-data1.xlsx]

## Sheet: T1 energy and water balance
Metabolic, renal and cardiovascular parameters in Sprague-Dawley rats treated with isoprenaline and maintained on either Water (ISO-Water) or TMAO (ISO-TMAO) solution in drinking water.
ISO WATER	Body mass	24hr food	24hour water	24hr urine
IW1	461	21	35.1	21.8
IW2	430.4	20.6	36.6	18.3
IW3	d	d	d	d
IW4	397	20.3	33.3	18.8
IW5	468.9	20.2	35.6	21.7
IW6	430	23.7	36.9	17.9
IW7	426.3	23.8	36.4	16.5
IW8	438.9	21.5	37.9	23.4
IW9	409.7	21.2	28.1	15.8
IW10	447.8	l/d	l/d	l/d
						d-died before meassurment
ISO TMAO	Body mass	24hr food	24hour water	24hr urine
IT1	494.8	21.8	41.2	22
IT2	462	23	40.1	28.9
IT3	467.7	23.8	29	14.2
IT4	422.2	20.7	34.8	19.3		l/d - lost/damaged/too small sample
IT5	406	21.7	31.2	17.5
IT6	370.8	18.7	35.1	20.3
IT7	440.1	21.4	33.9	16.6
IT8	395.1	25.5	35.3	17.6
IT9	416.1	19.9	32.8	23.9
IT10	452.1	21.9	l/d	l/d
			.

## Sheet: T3 energy and water balance
ISO WATER	Body mass	24hr food	24hour water	24hr urine	Tibia [cm]
IW1	454.5	21.8	44.1	26.2	4.132
IW2	425.7	17.2	35.4	19.4	4.482
IW3	d	d	d	d	d
IW4	455	23.9	29.3	16.2	4.375
IW5	402.9	21.2	38.2	23.9	4.327
IW6	446.2	23.8	31.9	14.8	4.279		l/d - lost/damaged/too small sample
IW7	435.7	21.5	41.9	23.9	4.341
IW8	479.5	23.4	35.1	19.4	4.375
IW9	420.1	18.6	29.5	15.8	4.363
IW10	428.4	19.8	27.5	17.5	4.317
							d-died before meassurment
ISO TMAO	Body mass	24hr food	24hour water	24hr urine	Tibia [cm]
IT1	406.6	22.3	37.9	19.5	4.307
IT2	362.3	19.4	34.9	22.5	4.267
IT3	441.7	21.7	38.8	18.89	4.403
IT4	413.5	21.8	34.9	18.3	4.367
IT5	393.1	21.4	32.6	15.5	4.419
IT6	448.3	20.4	35.3	22.3	4.396
IT7	477.6	21.9	34.65	24.1	4.187
IT8	454.5	26	36.9	21.2	4.515
IT9	460.8	23.8	34.4	19.8	4.294
IT10	l/d	l/d	l/d	l/d	4.229

## Sheet: TMAO
ISO WATER	TMAO plasma	TMAO urine 24hr
IW1	5.94484	6.71086
IW2	6.08729	3.66004
IW3	d	d
IW4	5.65327	5.02694
IW5	3.51064	7.46677
IW6	l/d	3.19467
IW7	3.84709	7.24286
IW8	10.6476	4.65372
IW9	6.78863	6.45618
IW10	5.13569	7.25139
										d-died before meassurment
										l/d - lost/damaged/too small sample
ISO TMAO	TMAO plasma	TMAO urine 24hr
IT1	50.61	179.942
IT2	24.64	226.616
IT3	29.81	186.575
IT4	l/d	55.8657
IT5	15.63	74.4914
IT6	47.37	122.036
IT7	29.93	67.5775
IT8	31.54	117.452
IT9	30.54	18.3618
IT10	l/d	142.294

## Sheet: Heart mass
ISO WATER	heart mass
IW1	1.415
IW2	1.453
IW3	d
IW4	1.4
IW5	1.317
IW6	1.381
IW7	1.496
IW8	1.609
IW9	1.692
IW10	1.367
					d-died before meassurment
ISO TMAO
IT1	1.234
IT2	1.131
IT3	1.511
IT4	1.305
IT5	1.433
IT6	1.465
IT7	1.68
IT8	1.67
IT9	1.602
IT10	1.283

## Sheet: arterial pressure
ISO WATER	systolic	diastolic	HR
IW1	131.787	88.353	370.951
IW2	148.433	105.303	372.381
IW3	d	d	d
IW4	150.945	93.5213	361.217
IW5	139.308	101.884	312.36
IW6	140.407	105.56	343.977
IW7	130.021	79.8833	346.565
IW8	159.441	103.919	381.027
IW9	x	x	x
IW10	139.473	98.3903	364.025
										x - meassurment failure
										d-died before meassurment
ISO TMAO	systolic	diastolic	HR
IT1	136.876	88.8849	310.398
IT2	121.871	81.1538	273.476
IT3	121.214	90.3677	382.642
IT4	143.099	85.6946	373.009
IT5	x	x	x
IT6	148.266	110.731	431.131
IT7	120.715	75.2094	315.737
IT8	x	x	x
IT9	118.511	85.6231	322.651
IT10	136.831	83.0475	344.499

## Sheet: T1 ECHO
ISO WATER	lv edv	lv esv	IVSs	Ivsd	SV	EF
IW1	0.51	0.18	0.3	0.2	0.33	64
IW2	0.17	0.04	0.32	0.26	0.13	78
IW3	d	d	d	d	d	d
IW4	0.16	0.03	0.36	0.31	0.13	79
IW5	0.4	0.1	0.33	0.24	0.1	73
IW6	0.75	0.31	X	0.16	0.44	59			d-died before meassurment
IW7	0.25	0.06	0.33	0.23	0.2	76
IW8	0.81	0.22	0.4	0.28	0.59	72
IW9	0.48	0.14	0.3	0.24	0.34	70
IW10	0.44	0.13	0.31	0.21	0.31	70
									x - echo failure
ISO TMAO	lv edv	lv esv	IVSs	Ivsd	SV	EF
IT1	0.57	0.16	0.28	0.2	0.41	71
IT2	0.41	0.25	0.38	0.16	0.16	38
IT3	0.52	0.06	0.34	0.22	0.47	89
IT4	0.37	0.12	0.26	0.25	0.25	67
IT5	0.2	0.06	0.29	0.26	0.14	70
IT6	0.24	0.04	0.35	0.26	0.2	82
IT7	0.4	0.08	0.28	0.19	0.32	81
IT8	0.27	0.07	0.39	0.27	0.29	74
IT9	0.03	0.19	0.33	0.24	0.13	77
IT10	x	x	x	x	x	x

## Sheet: t2 Echo
ISO WATER	lv edv	lv esv	IVSs	Ivsd	SV	EF
IW1	0.81	0.24	0.35	0.25	0.58	70
IW2	0.35	0.03	0.29	0.23	0.32	90			x - echo failure
IW3	0.56	0.35	0.28	0.26	0.21	74			d-died before meassurment
IW4	d	d	d	d	d	d
IW5	0.2	0.05	0.33	0.28	0.16	76
IW6	0.58	0.21	0.27	0.21	0.21	63
IW7	0.6	0.23	0.26	0.22	0.37	61
IW8	0.53	0.42	0.42	0.29	0.36	73
IW9	0.88	0.25	0.38	0.23	0.63	71
IW10	0.37	0.21	0.37	0.35	0.3	80
ISO TMAO	lv edv	lv esv	IVSs	Ivsd	SV	EF
IT1	x	x	0.22	0.21	0.63	42
IT2	0.9	0.2	0.31	0.21	0.7	77
IT3	x	x	0.26	0.23	0.82	67
IT4	0.32	0.05	0.45	0.31	0.27	83
IT5	0.37	0.11	0.35	0.25	0.26	69
IT6	0.39	0.08	0.39	0.27	0.31	78
IT7	0.68	0.14	0.48	0.28	0.54	79
IT8	0.44	0.13	0.34	0.23	0.31	70
IT9	x	x	x	x	x	x
IT10	0.64	0.22	0.32	0.29	0.43	66

## Sheet: T3 ECHO
ISO WATER	lv edv	lv esv	IVSs	Ivsd	SV	EF
IW1	0.43	0.12	0.33	0.23	0.3	71
IW2	0.44	0.04	0.4	0.3	0.39	89			x - echo failure
IW3	d	d	d	d	d	d			d-died before meassurment
IW4	0.39	0.13	0.42	0.31	0.31	78
IW5	0.49	0.09	0.34	0.25	0.25	81
IW6	0.58	0.08	0.31	0.23	0.5	86
IW7	0.74	0.2	0.29	0.18	0.54	72
IW8	0.56	0.18	0.38	0.26	0.39	84
IW9	0.54	0.17	0.38	0.23	0.37	68
IW10	0.43	0.09	0.37	0.21	0.34	79
ISO TMAO	lv edv	lv esv	IVSs	Ivsd	SV	EF
IT1	x	x	x	x	x	x
IT2	0.45	0.06	0.31	0.22	0.4	87
IT3	1.42	0.07	0.31	0.23	0.36	52
IT4	0.4	0.08	0.33	0.26	0.33	82
IT5	0.48	0.11	0.26	0.25	0.37	77
IT6	0.3	0.09	0.31	0.2	0.2	68
IT7	0.42	0.04	0.26	0.29	0.38	90
IT8	0.35	0.08	0.4	0.28	0.27	77
IT9	0.51	0.1	0.32	0.26	0.4	79
IT10	0.44	0.05	0.41	0.29	0.39	89

## Sheet: Left ventricle
ISO WATER	LVEDP	+dP/dT	-dP/dT
IW1	9.5319	10.9931	4.71
IW2	3.59	10.0252	5.13
IW3	d	d	d
IW4	6.74024	7.40024	5.53
IW5	4.17942	8.93563	5.5
IW6	x	x	x
IW7	9.62	8.66298	5.08
IW8	x	x	x
IW9	6.72	x	x
IW10	x	x	x						d-died before meassurment
									x - meassurment failure
ISO TMAO
IT1	4.1579	5.92535	5.68
IT2	4.62659	8.30141	4.98
IT3	x	x	x
IT4	3.13248	7.7489	3.98
IT5	5.06775	5.51456	4.48
IT6	x	x	x
IT7	4.59696	6.647	4.42
IT8	x	x	x
IT9	7.01819	4.44462	5.31
IT10	2.64918	7.26036	4.49

## Sheet: plasma NT
ISO WATER
IW1	l/d
IW2	90.0199
IW3	d
IW4	22.1319
IW5	17.3833			l/d - lost/damaged/too small sample
IW6	127.308
IW7	l/d			d-died before meassurment
IW8	44.5789
IW9	86.726
IW10	63.258
ISO TMAO
IT1	23.4201
IT2	l/d
IT3	4.90457
IT4	16.7931
IT5	6.57799
IT6	18.6077
IT7	9.47355
IT8	7.88962
IT9	32.4179
IT10	77.9874

[truncated: 3 more sheets: Electrolyte balance, Hormones, Arkusz11]
